# Supplementary material for: Pseudonectrins A–D, heptaketides from an endophytic fungus Nectria pseudotrichia
Source: Royal Society of Chemistry journal article supplement (doi:10.1039/c9ra01787a), 2019-01-01

## Supporting Information

### **Pseudonectrins A–D, heptaketides from an endophytic fungus *Nectria pseudotrichia***

Peinan Fu,<sup>ab</sup> Tingnan Zhou,<sup>ab</sup> Fengxia Ren,<sup>b</sup> Shuaiming Zhu,<sup>b</sup> Yang Zhang,<sup>\*b</sup>

Wenyong Zhuang<sup>c</sup> and Yongsheng Che<sup>\*bd</sup>

#### **Affiliation**

<sup>a</sup> School of Medicine and Life Sciences, Nanjing University of Chinese Medicine, Nanjing 210023, People's Republic of China

<sup>b</sup> State Key Laboratory of Toxicology & Medical Countermeasures, Beijing Institute of Pharmacology & Toxicology, Beijing 100850, People's Republic of China

<sup>c</sup> State Key Laboratory of Mycology, Institute of Microbiology, Chinese Academy of Sciences, Beijing 100101, People's Republic of China

<sup>d</sup> Institute of Medicinal Biotechnology, Chinese Academy of Medical Sciences & Peking Union Medical College, Beijing 100730, People's Republic of China

#### **Correspondence**

\* To whom correspondence should be addressed.

Yongsheng Che. E-mail: cheys@im.ac.cn; Yang Zhang. E-mail: zhangyang@bmi.ac.cn.

| <b>Contents</b>                                                                                                             | <b>Page</b> |
|-----------------------------------------------------------------------------------------------------------------------------|-------------|
| 1) <b>Figure S1.</b> $^1\text{H}$ NMR spectrum of pseudonectrin A ( <b>1</b> ; 600 MHz, $\text{CDCl}_3$ )                   | 5           |
| 2) <b>Figure S2.</b> $^{13}\text{C}$ NMR spectrum of pseudonectrin A ( <b>1</b> ; 150 MHz, $\text{CDCl}_3$ )                | 6           |
| 3) <b>Figure S3.</b> HSQC spectrum of pseudonectrin A ( <b>1</b> ; 600 MHz, $\text{CDCl}_3$ )                               | 7           |
| 4) <b>Figure S4.</b> $^1\text{H}$ - $^1\text{H}$ COSY spectrum of pseudonectrin A ( <b>1</b> ; 600 MHz, $\text{CDCl}_3$ )   | 8           |
| 5) <b>Figure S5.</b> HMBC spectrum of pseudonectrin A ( <b>1</b> ; 600 MHz, $\text{CDCl}_3$ )                               | 9           |
| 6) <b>Figure S6.</b> NOESY spectrum of pseudonectrin A ( <b>1</b> ; 600 MHz, $\text{CDCl}_3$ )                              | 10          |
| 7) <b>Figure S7.</b> $^1\text{H}$ NMR spectrum of pseudonectrin B ( <b>2</b> ; 600 MHz, $\text{CDCl}_3$ )                   | 11          |
| 8) <b>Figure S8.</b> $^{13}\text{C}$ NMR spectrum of pseudonectrin B ( <b>2</b> ; 150 MHz, $\text{CDCl}_3$ )                | 12          |
| 9) <b>Figure S9.</b> HSQC spectrum of pseudonectrin B ( <b>2</b> ; 600 MHz, $\text{CDCl}_3$ )                               | 13          |
| 10) <b>Figure S10.</b> $^1\text{H}$ - $^1\text{H}$ COSY spectrum of pseudonectrin B ( <b>2</b> ; 600 MHz, $\text{CDCl}_3$ ) | 14          |
| 11) <b>Figure S11.</b> HMBC spectrum of pseudonectrin B ( <b>2</b> ; 600 MHz, $\text{CDCl}_3$ )                             | 15          |
| 12) <b>Figure S12.</b> NOESY spectrum of pseudonectrin B ( <b>2</b> ; 600 MHz, $\text{CDCl}_3$ )                            | 16          |
| 13) <b>Figure S13.</b> $^1\text{H}$ NMR spectrum of pseudonectrin C ( <b>3</b> ; 600 MHz, $\text{CDCl}_3$ )                 | 17          |
| 14) <b>Figure S14.</b> $^{13}\text{C}$ NMR spectrum of pseudonectrin C ( <b>3</b> ; 150 MHz, $\text{CDCl}_3$ )              | 18          |
| 15) <b>Figure S15.</b> HSQC spectrum of pseudonectrin C ( <b>3</b> ; 600 MHz, $\text{CDCl}_3$ )                             | 19          |
| 16) <b>Figure S16.</b> $^1\text{H}$ - $^1\text{H}$ COSY spectrum of pseudonectrin C ( <b>3</b> ; 600 MHz, $\text{CDCl}_3$ ) | 20          |
| 17) <b>Figure S17.</b> HMBC spectrum of pseudonectrin C ( <b>3</b> ; 600 MHz, $\text{CDCl}_3$ )                             | 21          |
| 18) <b>Figure S18.</b> NOESY spectrum of pseudonectrin C ( <b>3</b> ; 600 MHz, $\text{CDCl}_3$ )                            | 22          |

|                                                                                                                             |    |
|-----------------------------------------------------------------------------------------------------------------------------|----|
| 19) <b>Figure S19.</b> $^1\text{H}$ NMR spectrum of pseudonectrin D ( <b>4</b> ; 600 MHz, $\text{CDCl}_3$ )                 | 23 |
| 20) <b>Figure S20.</b> $^{13}\text{C}$ NMR spectrum of pseudonectrin D ( <b>4</b> ; 150 MHz, $\text{CDCl}_3$ )              | 24 |
| 21) <b>Figure S21.</b> HSQC spectrum of pseudonectrin D ( <b>4</b> ; 600 MHz, $\text{CDCl}_3$ )                             | 25 |
| 22) <b>Figure S22.</b> $^1\text{H}$ - $^1\text{H}$ COSY spectrum of pseudonectrin D ( <b>4</b> ; 600 MHz, $\text{CDCl}_3$ ) | 26 |
| 23) <b>Figure S23.</b> HMBC spectrum of pseudonectrin D ( <b>4</b> ; 600 MHz, $\text{CDCl}_3$ )                             | 27 |
| 24) <b>Figure S24.</b> NOESY spectrum of pseudonectrin D ( <b>4</b> ; 600 MHz, $\text{CDCl}_3$ )                            | 28 |
| 25) <b>Figure S25.</b> Relative configurations and the optimized conformers for <b>1</b>                                    | 29 |
| 26) <b>Figure S26.</b> Relative configurations and the optimized conformers for <b>2</b>                                    | 30 |
| 27) <b>Figure S27.</b> Relative configurations and the optimized conformers for <b>3</b>                                    | 31 |
| 28) <b>Figure S28.</b> UV spectrum of pseudonectrin A ( <b>1</b> ) in MeOH                                                  | 32 |
| 29) <b>Figure S29.</b> UV spectrum of pseudonectrin B ( <b>2</b> ) in MeOH                                                  | 33 |
| 30) <b>Figure S30.</b> UV spectrum of pseudonectrin C ( <b>3</b> ) in MeOH                                                  | 34 |
| 31) <b>Figure S31.</b> UV spectrum of pseudonectrin D ( <b>4</b> ) in MeOH                                                  | 35 |
| 32) <b>Figure S32.</b> Experimental CD spectrum of <b>1</b> in MeOH                                                         | 36 |
| 33) <b>Figure S33.</b> Experimental CD spectrum of <b>2</b> in MeOH                                                         | 37 |
| 34) <b>Figure S34.</b> Experimental CD spectrum of <b>3</b> in MeOH                                                         | 38 |
| 35) <b>Figure S35.</b> Experimental CD spectrum of <b>4</b> in MeOH                                                         | 39 |
| 36) <b>Figure S36.</b> IR spectrum of pseudonectrin A ( <b>1</b> )                                                          | 40 |
| 37) <b>Figure S37.</b> IR spectrum of pseudonectrin B ( <b>2</b> )                                                          | 41 |
| 38) <b>Figure S38.</b> IR spectrum of pseudonectrin C ( <b>3</b> )                                                          | 42 |
| 39) <b>Figure S39.</b> IR spectrum of pseudonectrin D ( <b>4</b> )                                                          | 43 |

|                                                                                                                                                     |    |
|-----------------------------------------------------------------------------------------------------------------------------------------------------|----|
| 40) <b>Figure S40.</b> HRESIMS spectrum of pseudonectrin A ( <b>1</b> )                                                                             | 44 |
| 41) <b>Figure S41.</b> HRESIMS spectrum of pseudonectrin B ( <b>2</b> )                                                                             | 45 |
| 42) <b>Figure S42.</b> HRESIMS spectrum of pseudonectrin C ( <b>3</b> )                                                                             | 46 |
| 43) <b>Figure S43.</b> HRESIMS spectrum of pseudonectrin D ( <b>4</b> )                                                                             | 47 |
| 44) <b>Figure S44.</b> <sup>1</sup> H NMR spectrum of 2-acetyl-5,7-dimethoxy-3-methyl-1,4-naphthoquinone ( <b>5</b> ; 400 MHz, CDCl <sub>3</sub> )  | 48 |
| 45) <b>Figure S45.</b> <sup>13</sup> C NMR spectrum of 2-acetyl-5,7-dimethoxy-3-methyl-1,4-naphthoquinone ( <b>5</b> ; 150 MHz, CDCl <sub>3</sub> ) | 49 |
| 46) <b>Figure S46.</b> <sup>1</sup> H NMR spectrum of herbarin ( <b>6</b> ; 600 MHz, CDCl <sub>3</sub> )                                            | 50 |
| 47) <b>Figure S47.</b> <sup>13</sup> C NMR spectrum of herbarin ( <b>6</b> ; 150 MHz, CDCl <sub>3</sub> )                                           | 51 |
| 48) <b>Figure S48.</b> <sup>1</sup> H NMR spectrum of dehydroherbarin ( <b>7</b> ; 400 MHz, CDCl <sub>3</sub> )                                     | 52 |
| 49) <b>Figure S49.</b> <sup>13</sup> C NMR spectrum of dehydroherbarin ( <b>7</b> ; 150 MHz, CDCl <sub>3</sub> )                                    | 53 |
| 50) <b>Figure S50.</b> <sup>1</sup> H NMR spectrum of scorpinone ( <b>8</b> ; 400 MHz, CDCl <sub>3</sub> )                                          | 54 |
| 51) <b>Figure S51.</b> <sup>13</sup> C NMR spectrum of scorpinone ( <b>8</b> ; 150 MHz, CDCl <sub>3</sub> )                                         | 55 |
| Melting points and spectroscopic data of compounds <b>5–8</b>                                                                                       | 56 |
| 52) <b>Scheme S1.</b> Hypothetical biosynthetic pathways for <b>1–8</b>                                                                             | 58 |

**Figure S1.**  $^1\text{H}$  NMR Spectrum of Pseudonectrin A (**1**; 600 MHz,  $\text{CDCl}_3$ )

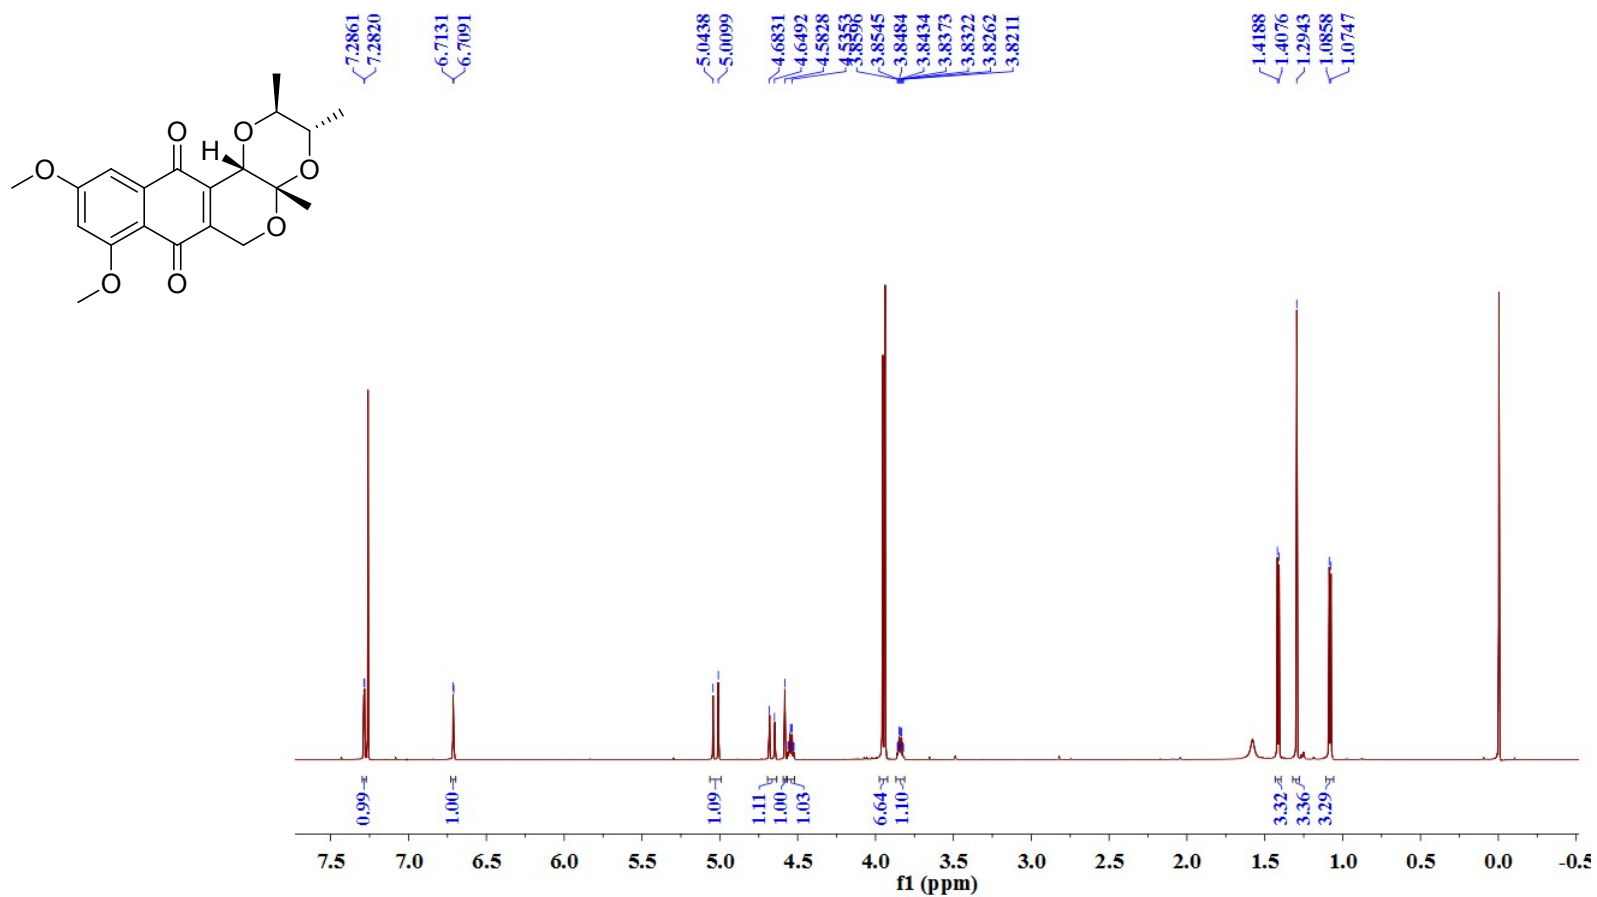



**Figure S3.** HSQC Spectrum of Pseudonectrin A (**1**; 600 MHz, CDCl<sub>3</sub>)

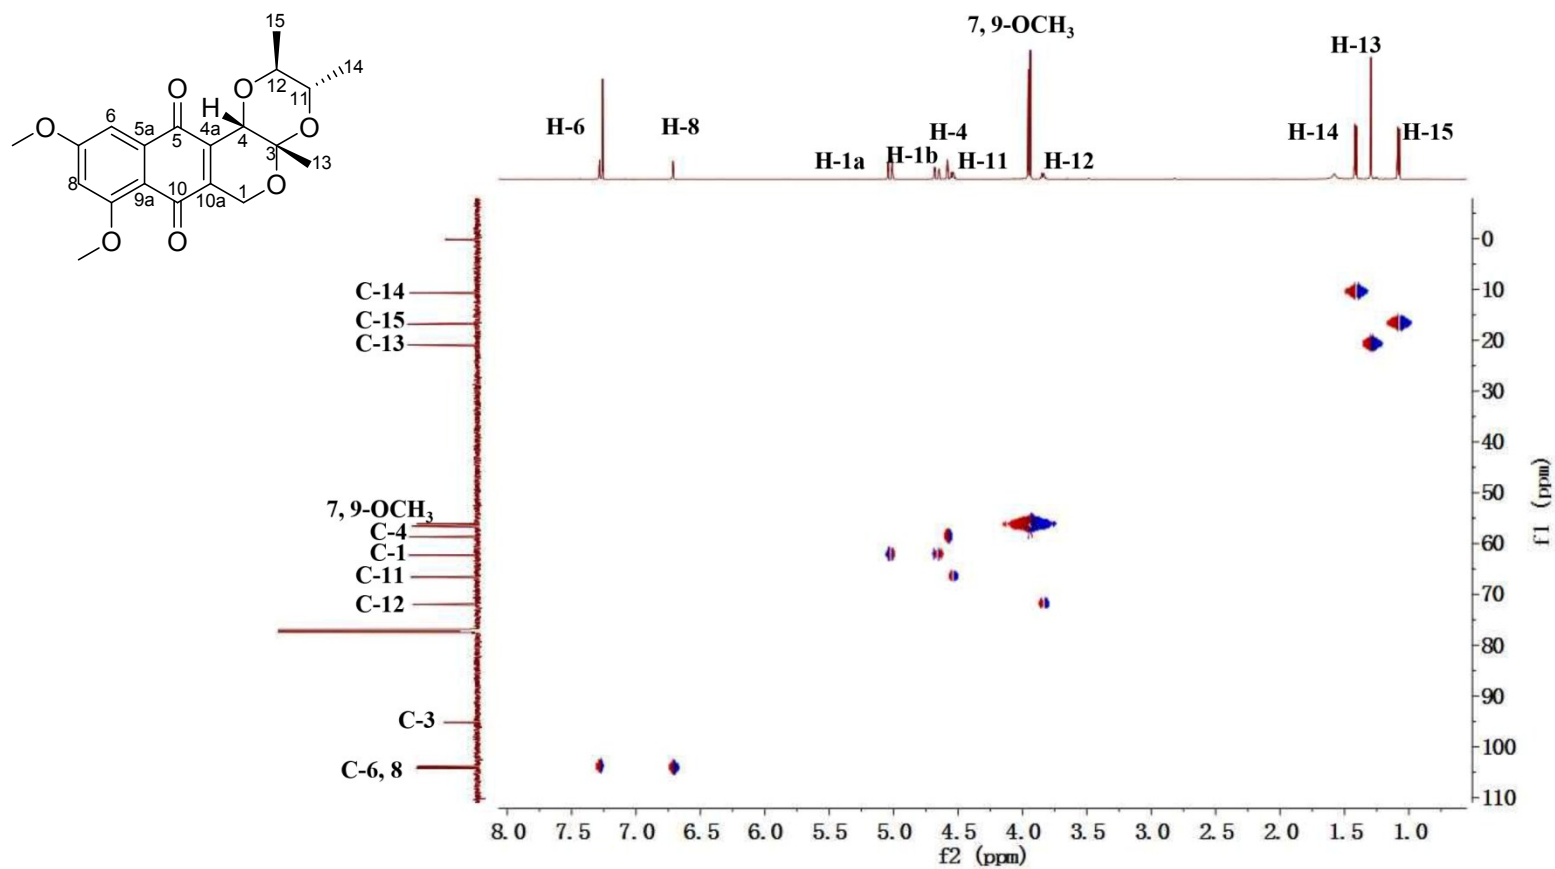

C

**Figure S4.**  $^1\text{H}$ - $^1\text{H}$  COSY Spectrum of Pseudonectrin A (**1**; 600 MHz,  $\text{CDCl}_3$ )

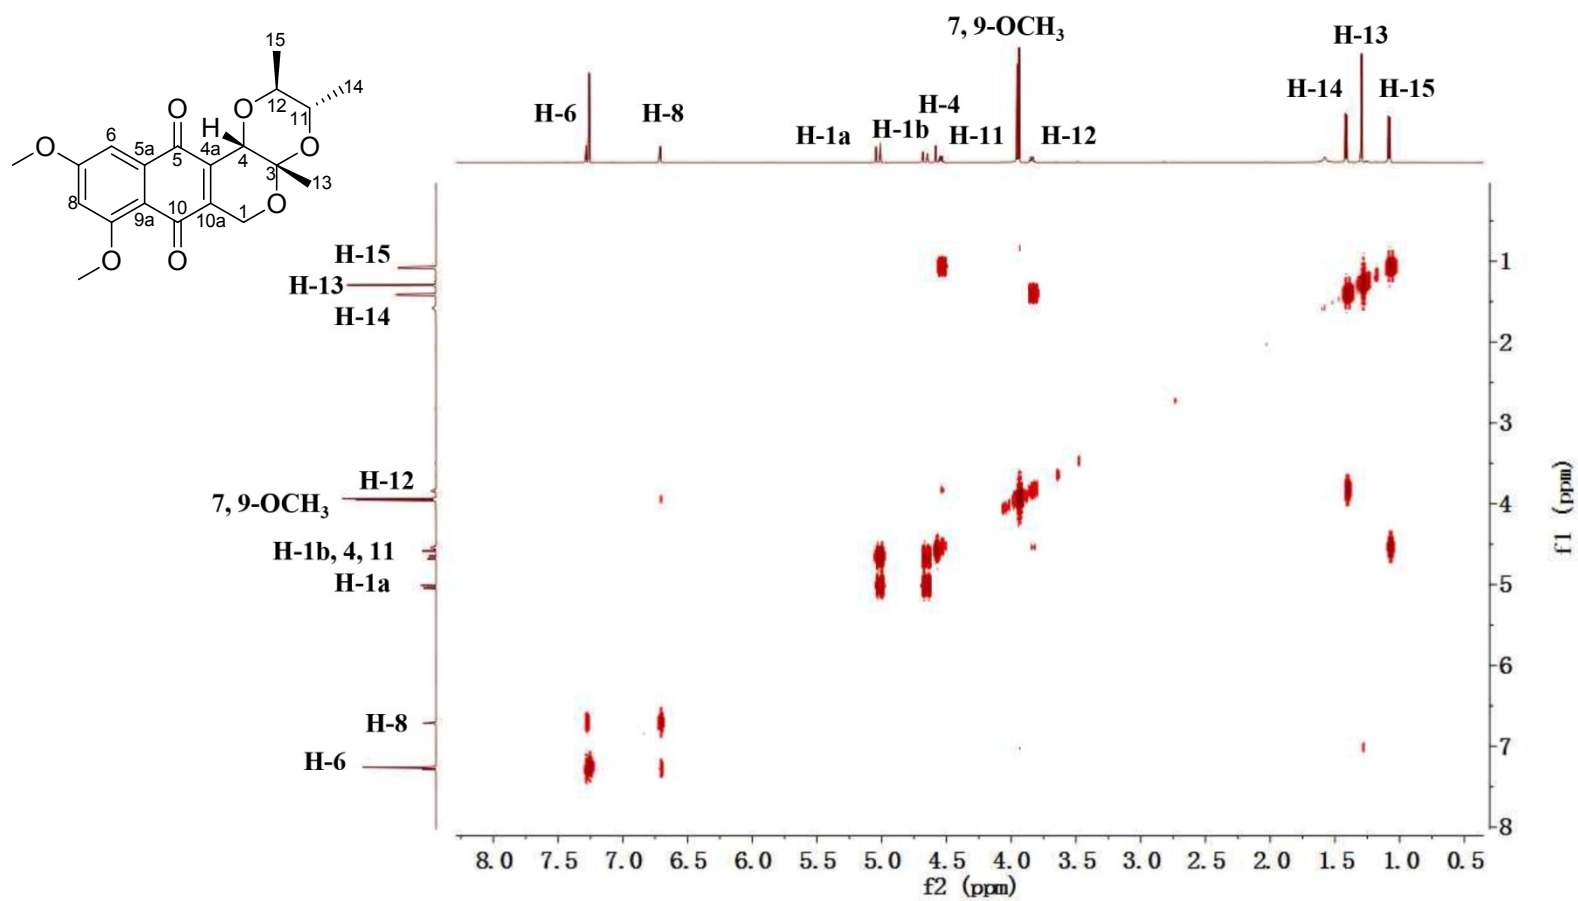



**Figure S5.** HMBC Spectrum of Pseudonectrin A (1; 600 MHz, CDCl<sub>3</sub>)

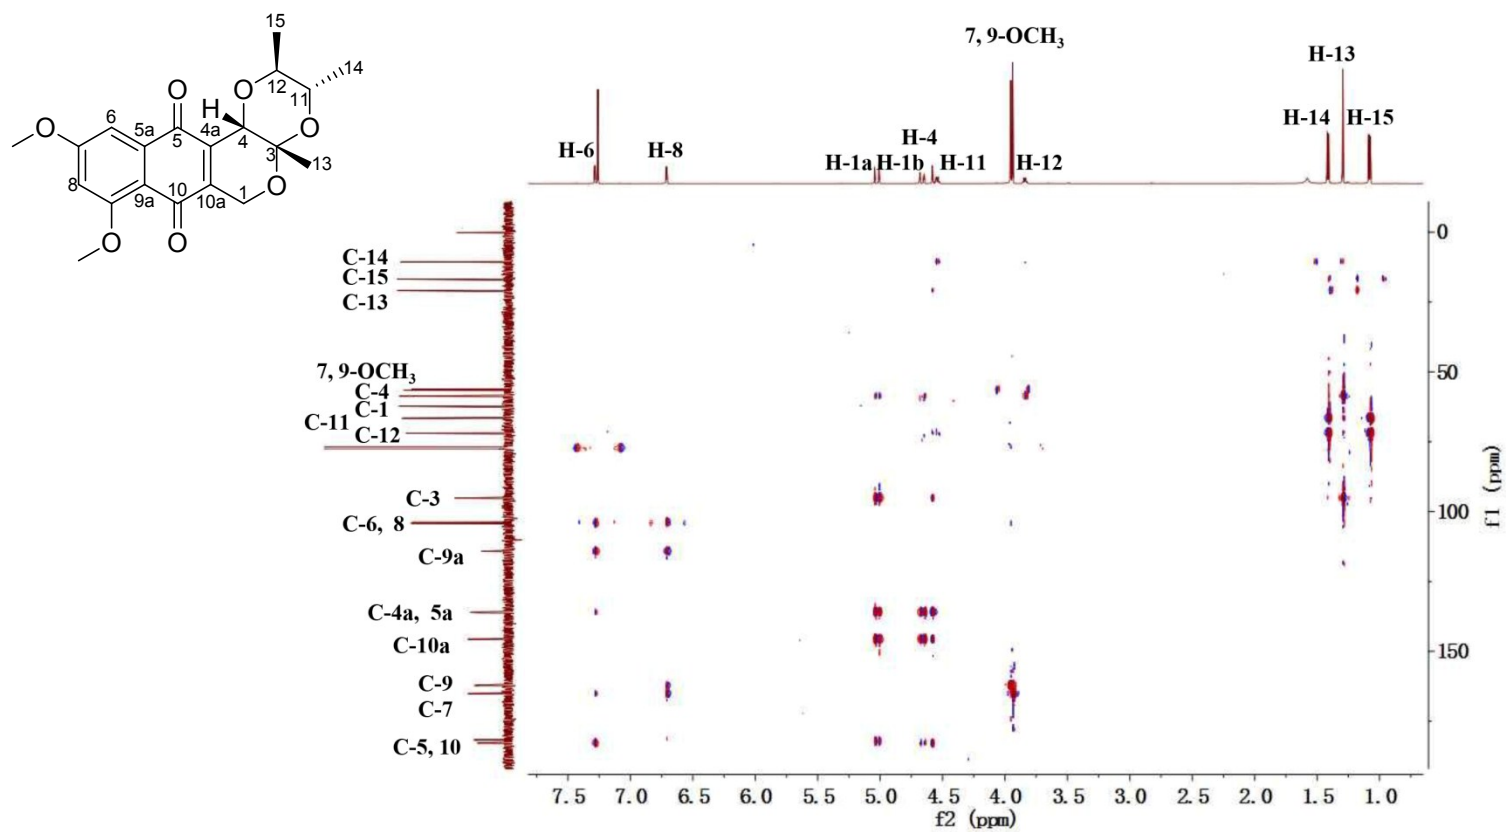

**Figure S6.** NOESY Spectrum of Pseudonectrin A (**1**; 600 MHz, CDCl<sub>3</sub>)

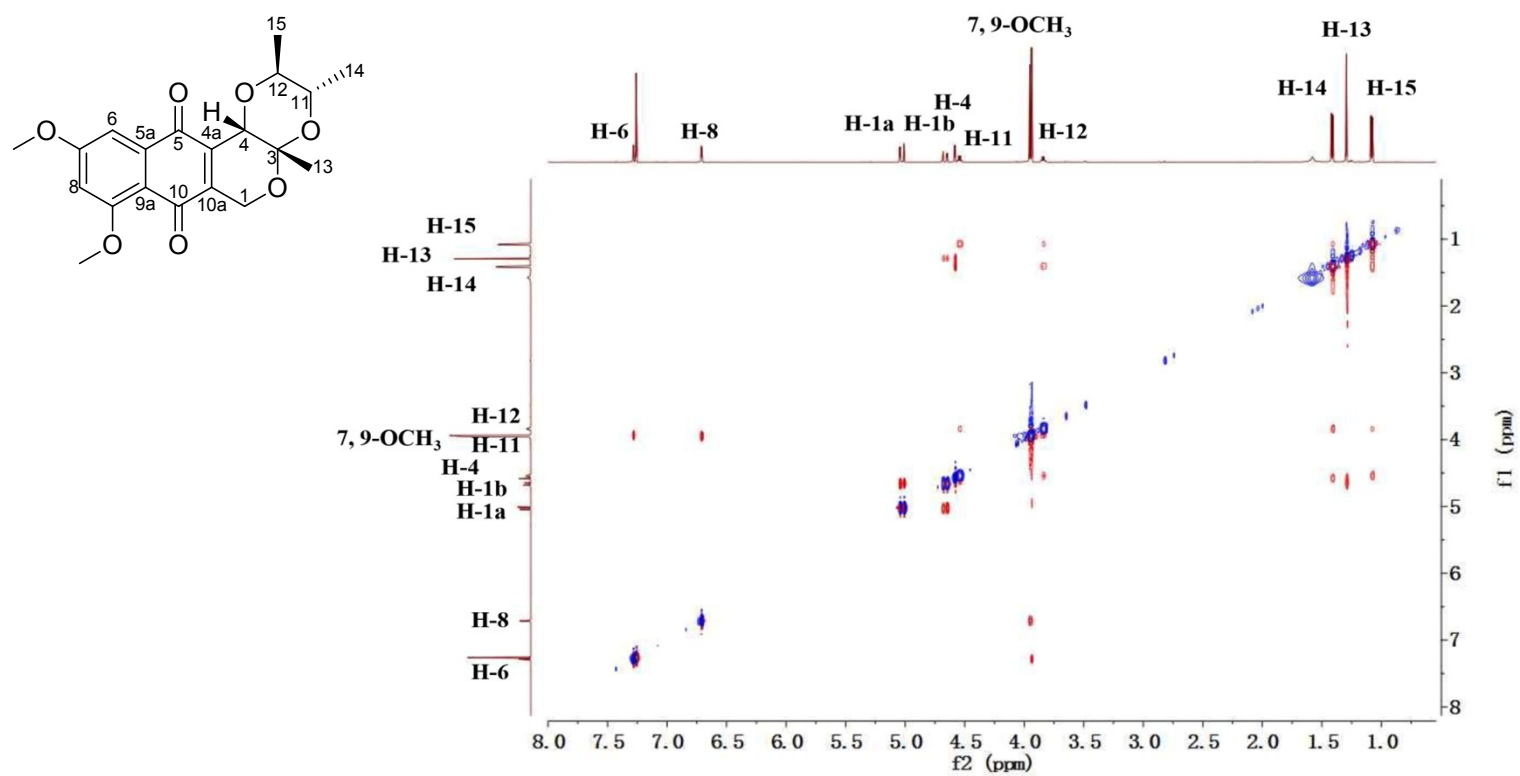

**Figure S7.**  $^1\text{H}$  NMR Spectrum of Pseudonectrin B (**2**; 600 MHz,  $\text{CDCl}_3$ )

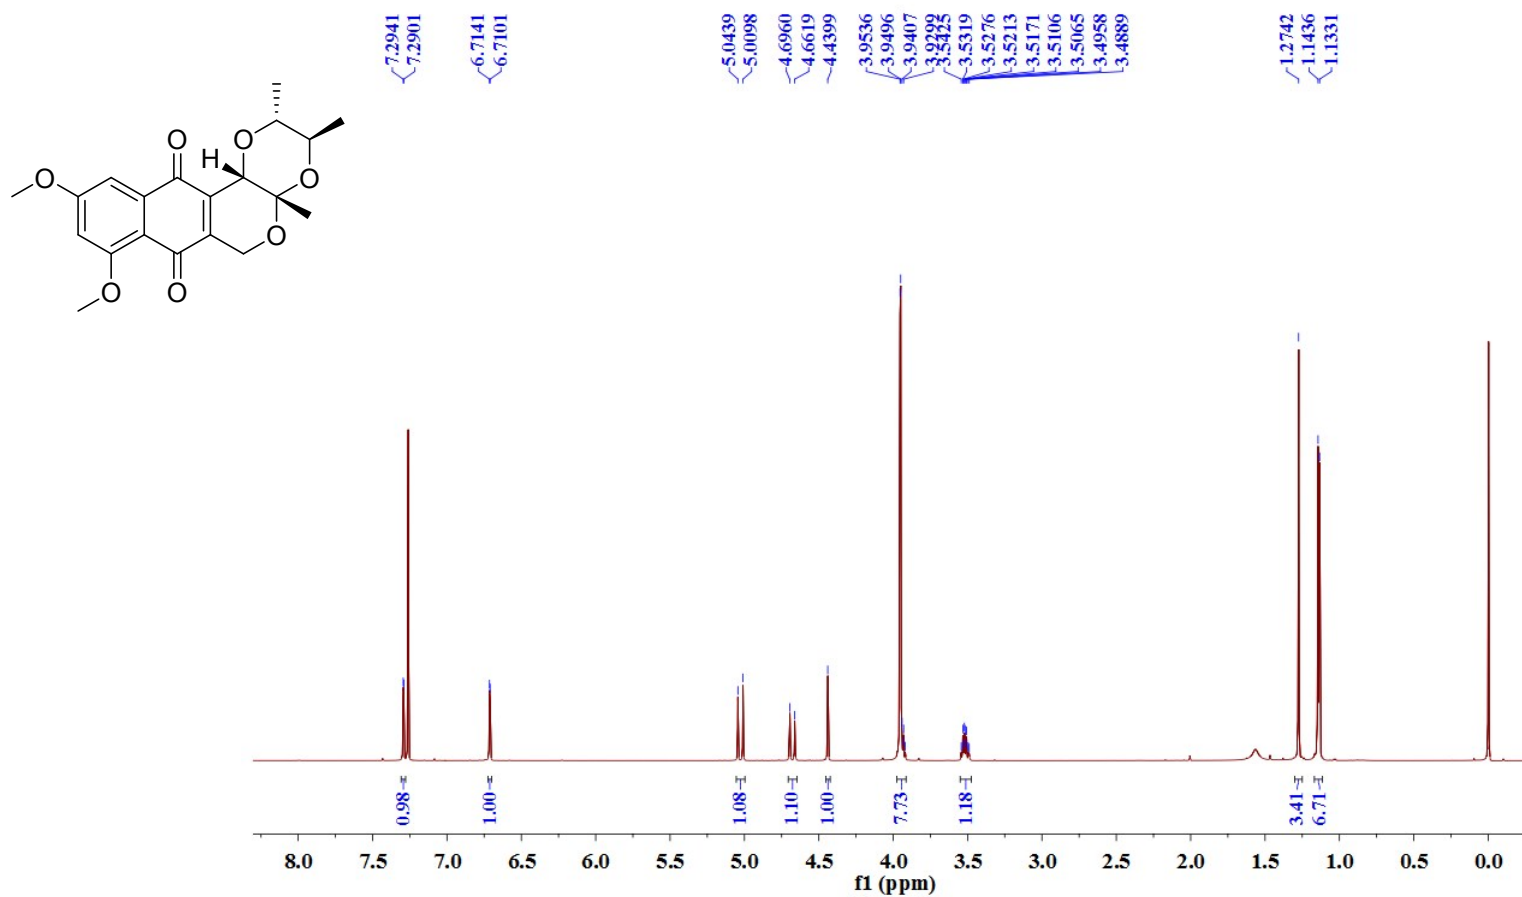

**Figure S8.**  $^{13}\text{C}$  NMR Spectrum of Pseudonectrin B (**2**; 150 MHz,  $\text{CDCl}_3$ )

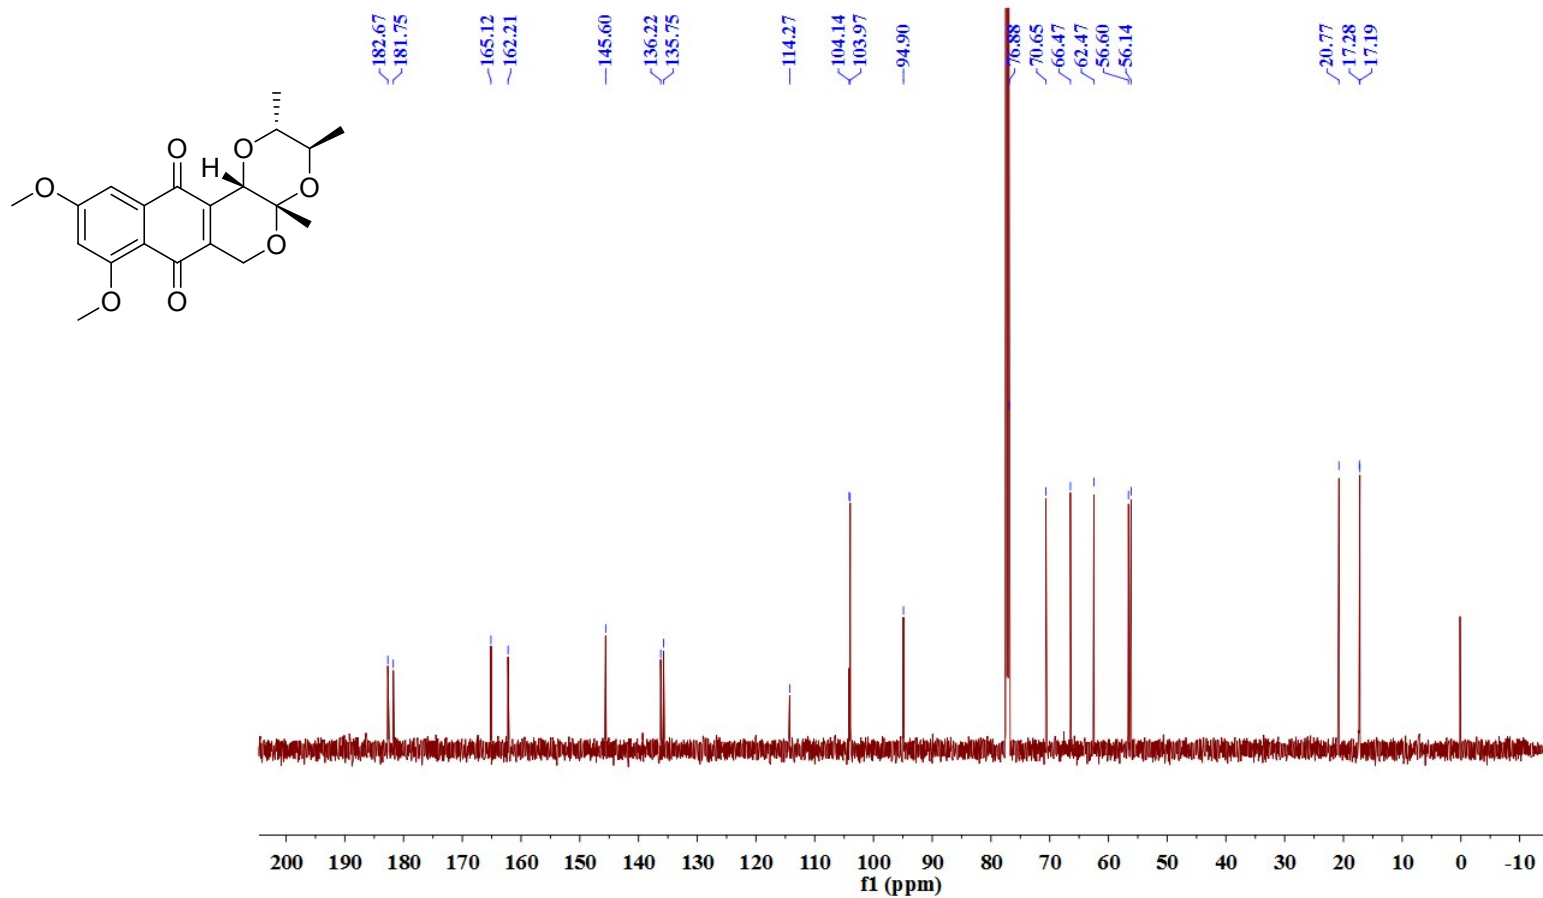

**Figure S9.** HSQC Spectrum of Pseudonectrin B (**2**; 600 MHz, CDCl<sub>3</sub>)

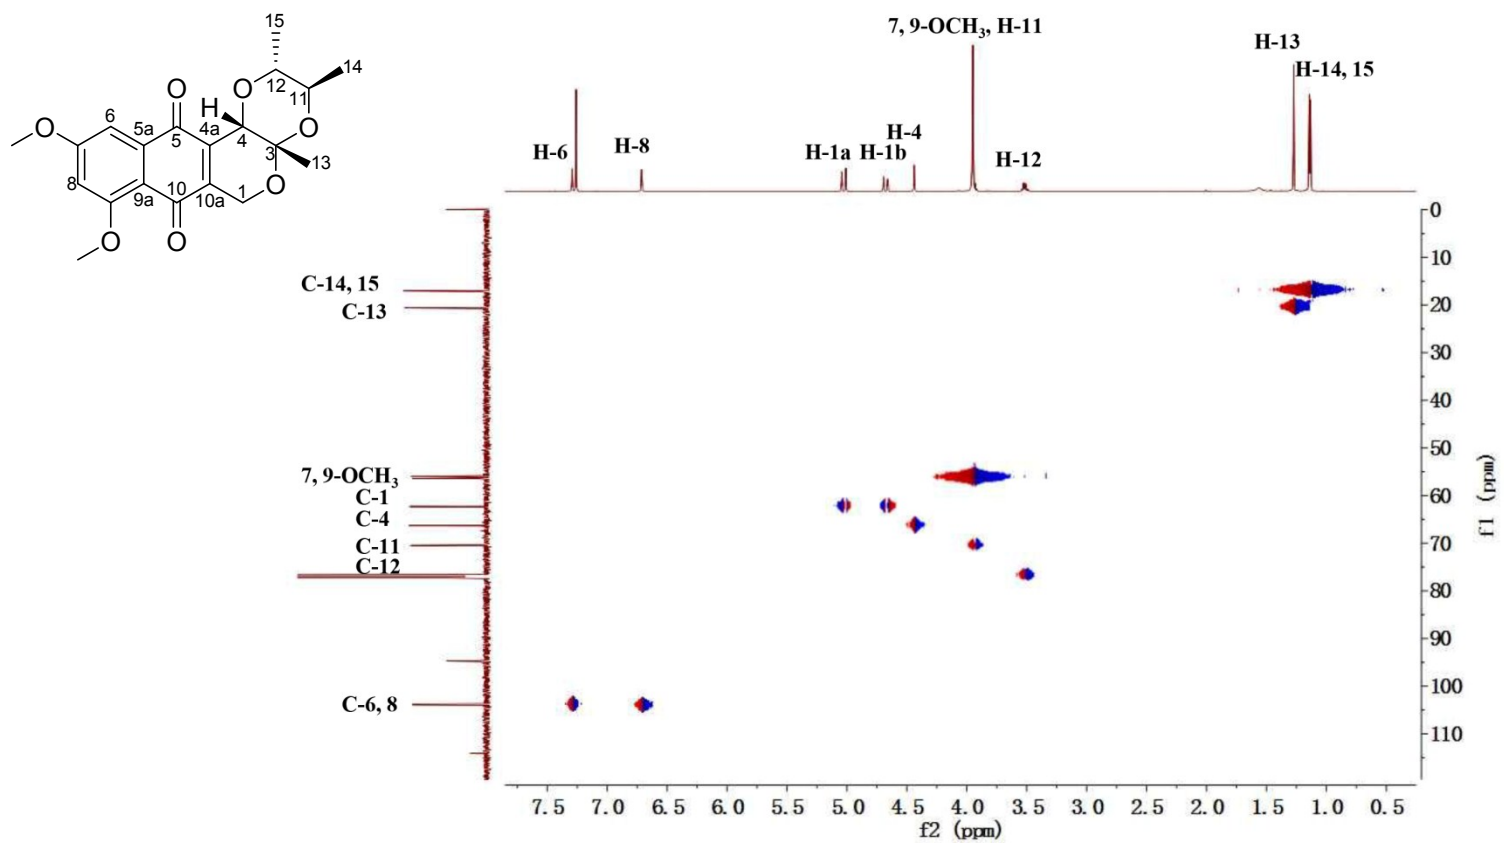

**Figure S10.**  $^1\text{H}$ - $^1\text{H}$  COSY Spectrum of Pseudonectrin B (**2**; 600 MHz,  $\text{CDCl}_3$ )

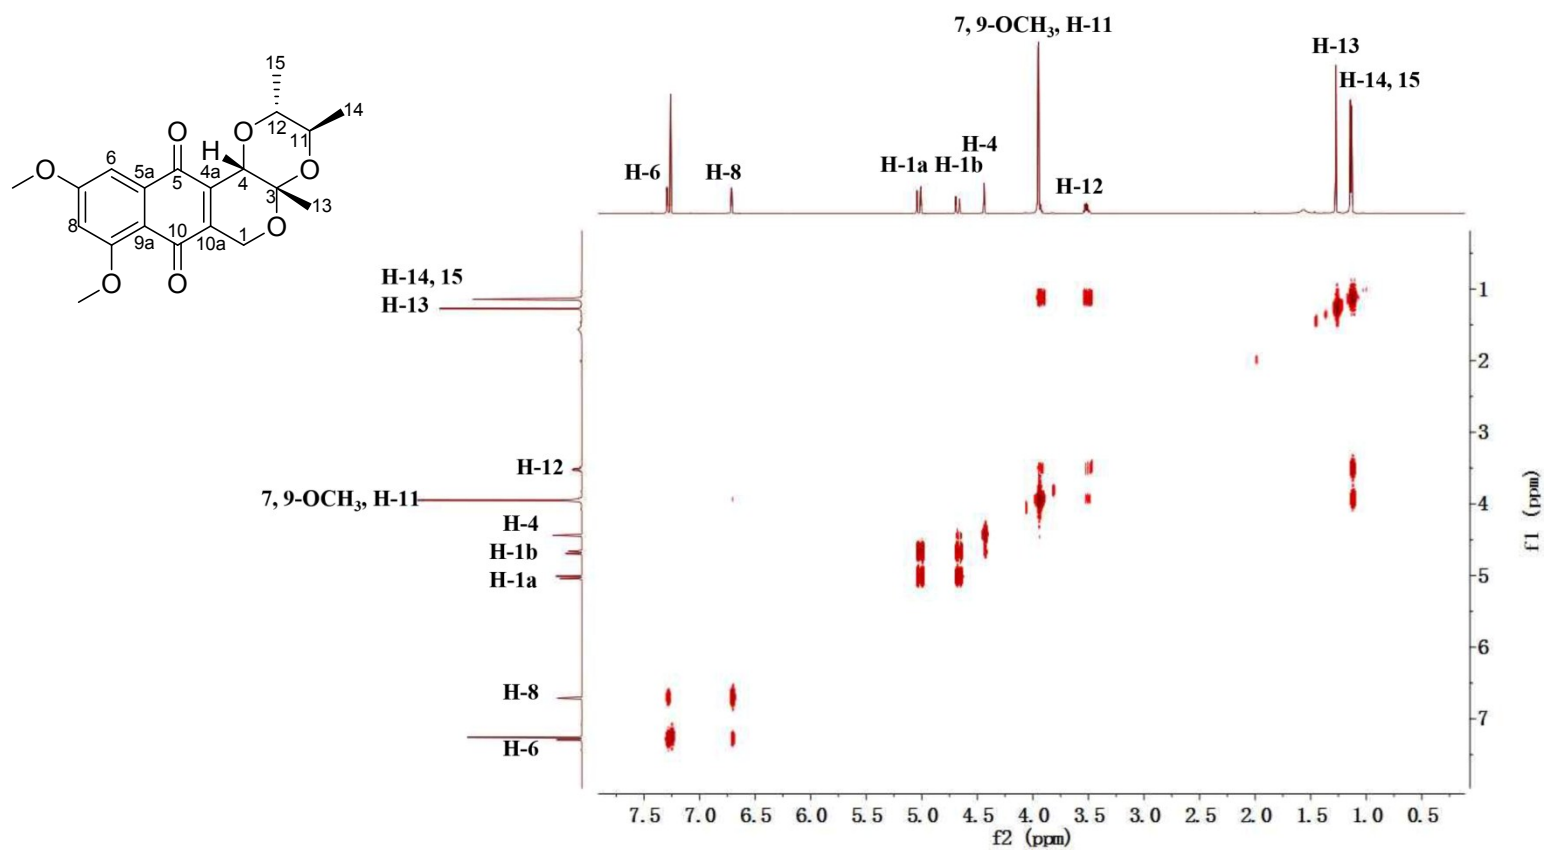

**Figure S11.** HMBC Spectrum of Pseudonectrin B (**2**; 600 MHz, CDCl<sub>3</sub>)

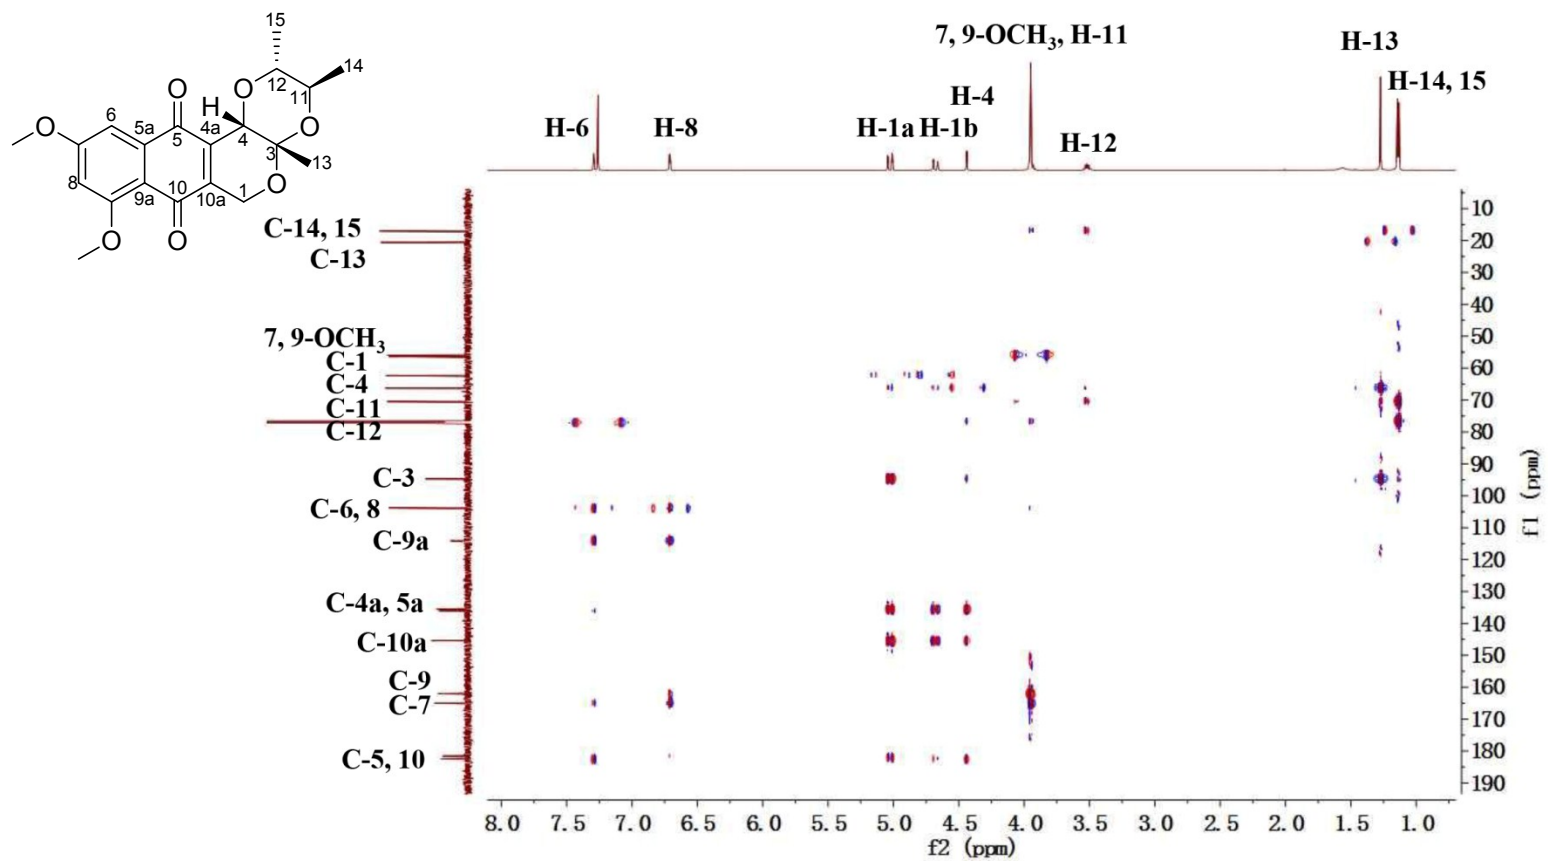

**Figure S12.** NOESY Spectrum of Pseudonectrin B (**2**; 600 MHz, CDCl<sub>3</sub>)

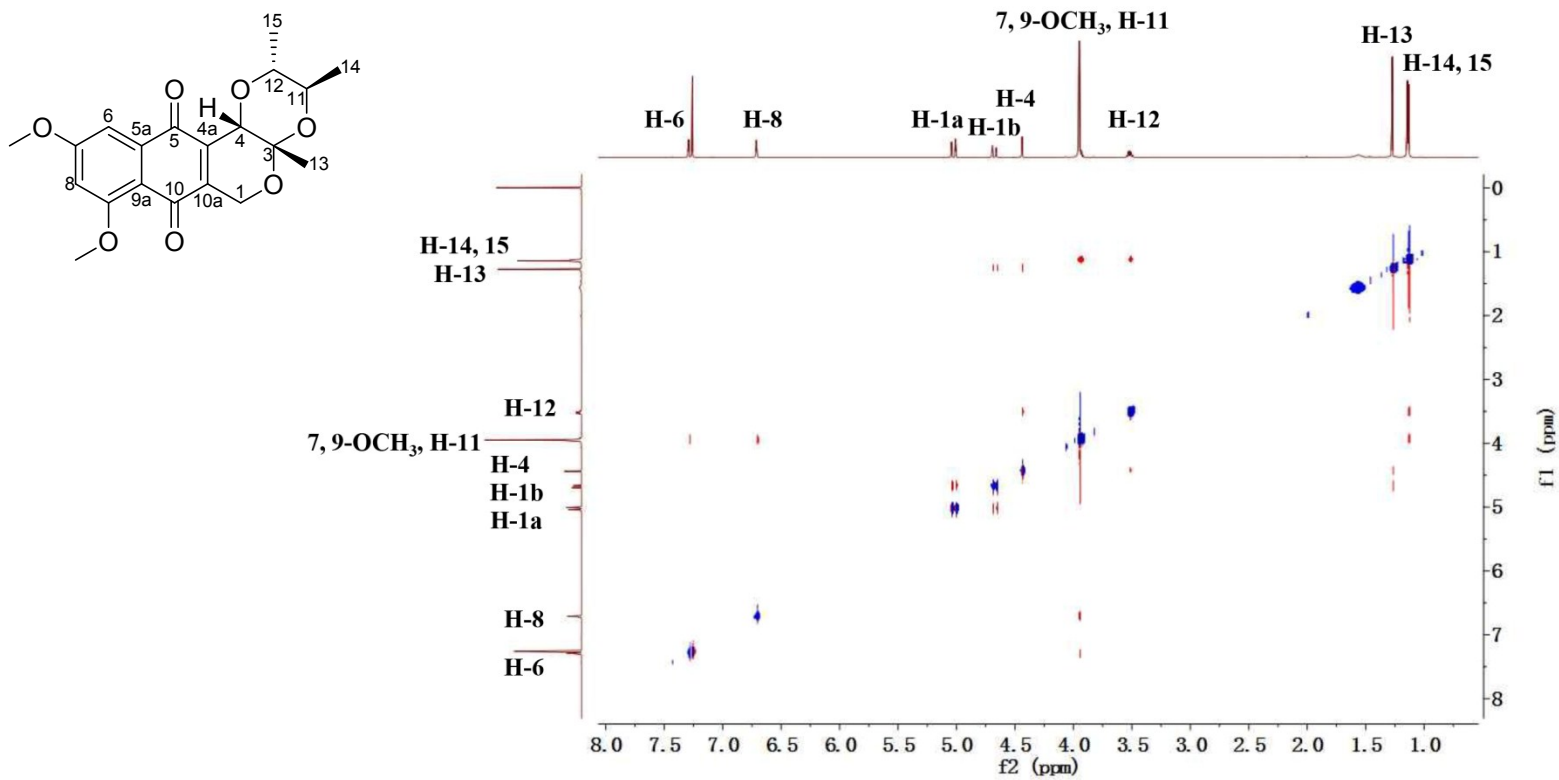



**Figure S13.**  $^1\text{H}$  NMR Spectrum of Pseudonectrin C (**3**; 600 MHz,  $\text{CDCl}_3$ )

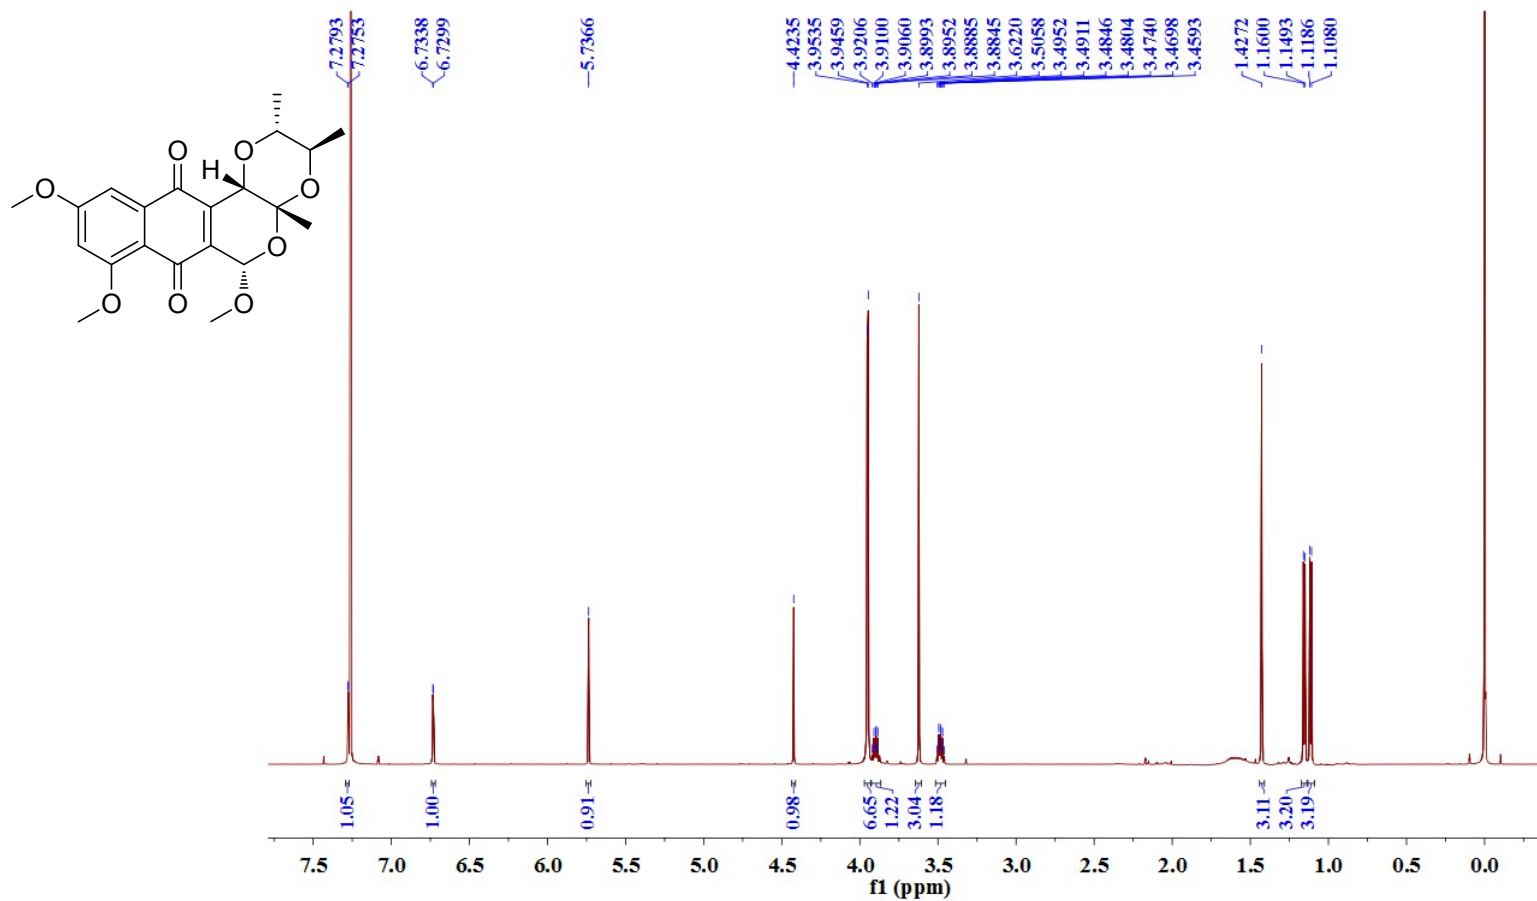

**Figure S14.**  $^{13}\text{C}$  NMR Spectrum of Pseudonectrin C (**3**; 150 MHz,  $\text{CDCl}_3$ )

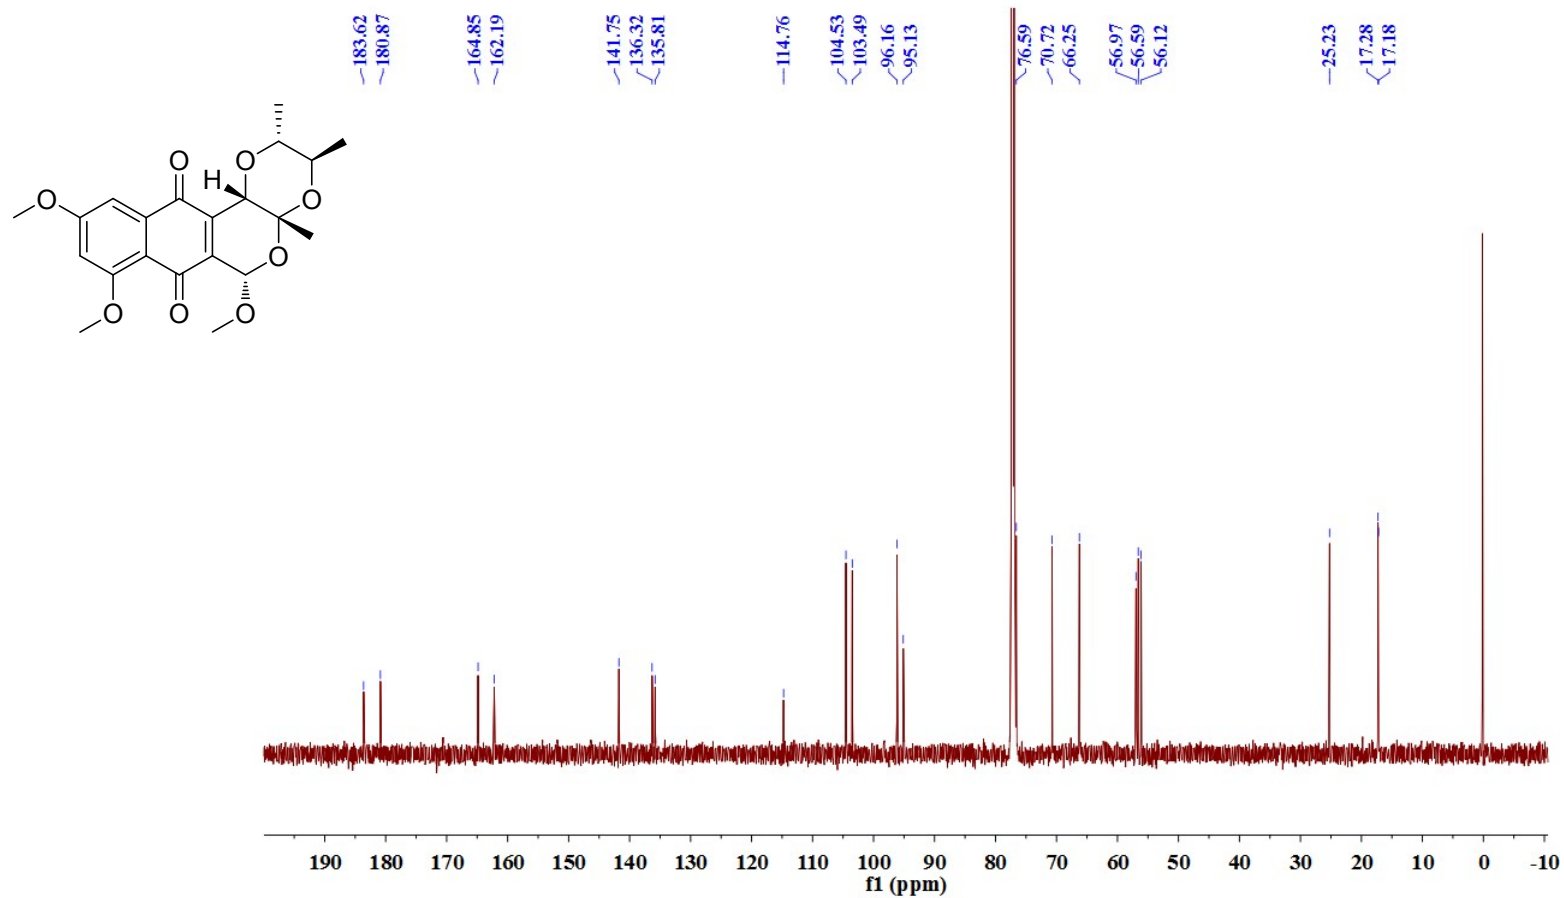

**Figure S15.** HSQC Spectrum of Pseudonectrin C (**3**; 600 MHz, CDCl<sub>3</sub>)

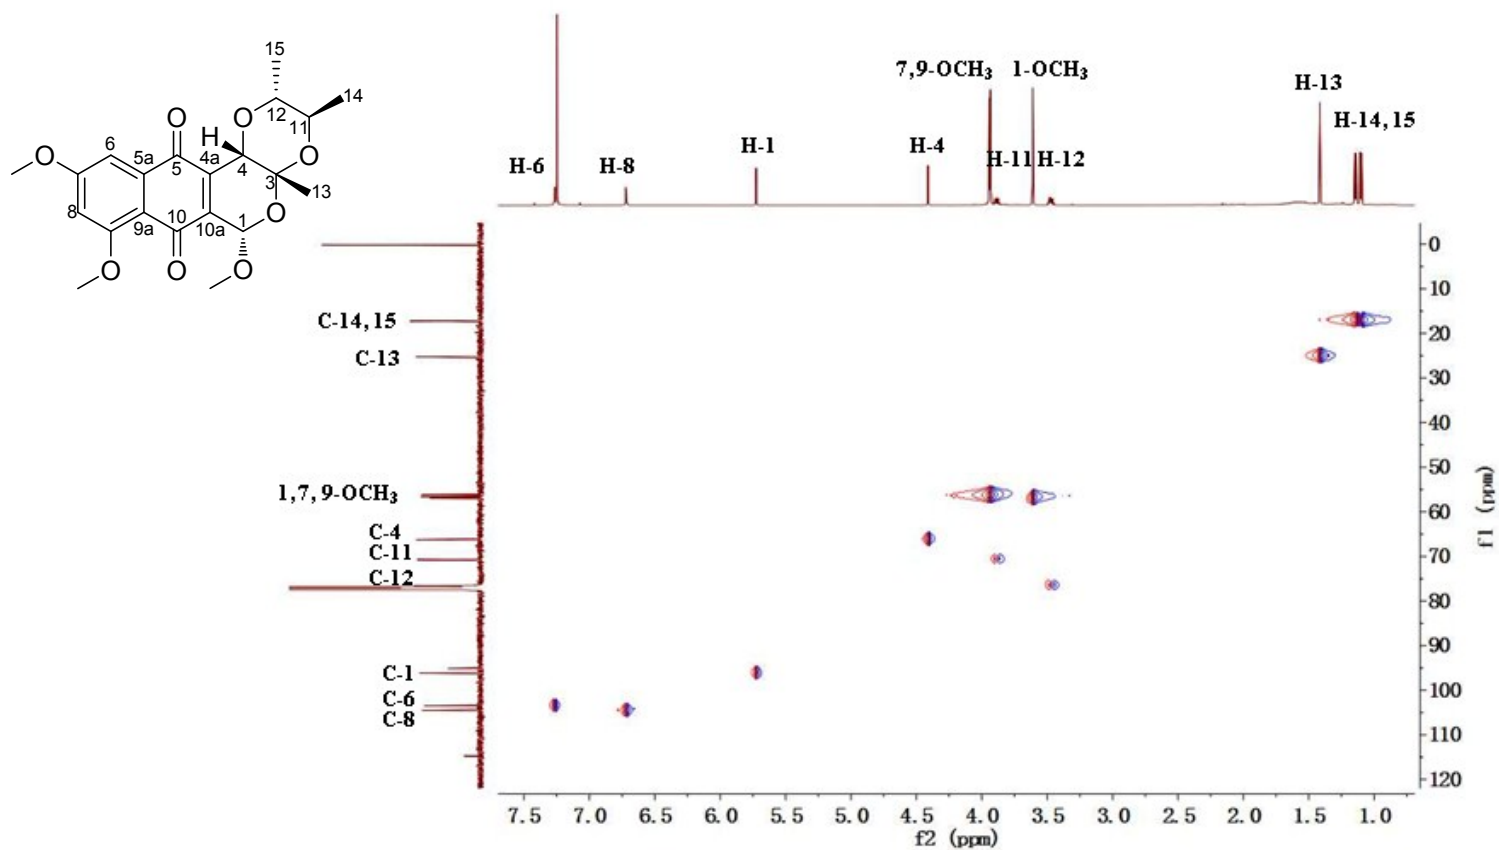

**Figure S16.**  $^1\text{H}$ - $^1\text{H}$  COSY Spectrum of Pseudonectrin C (**3**; 600 MHz,  $\text{CDCl}_3$ )

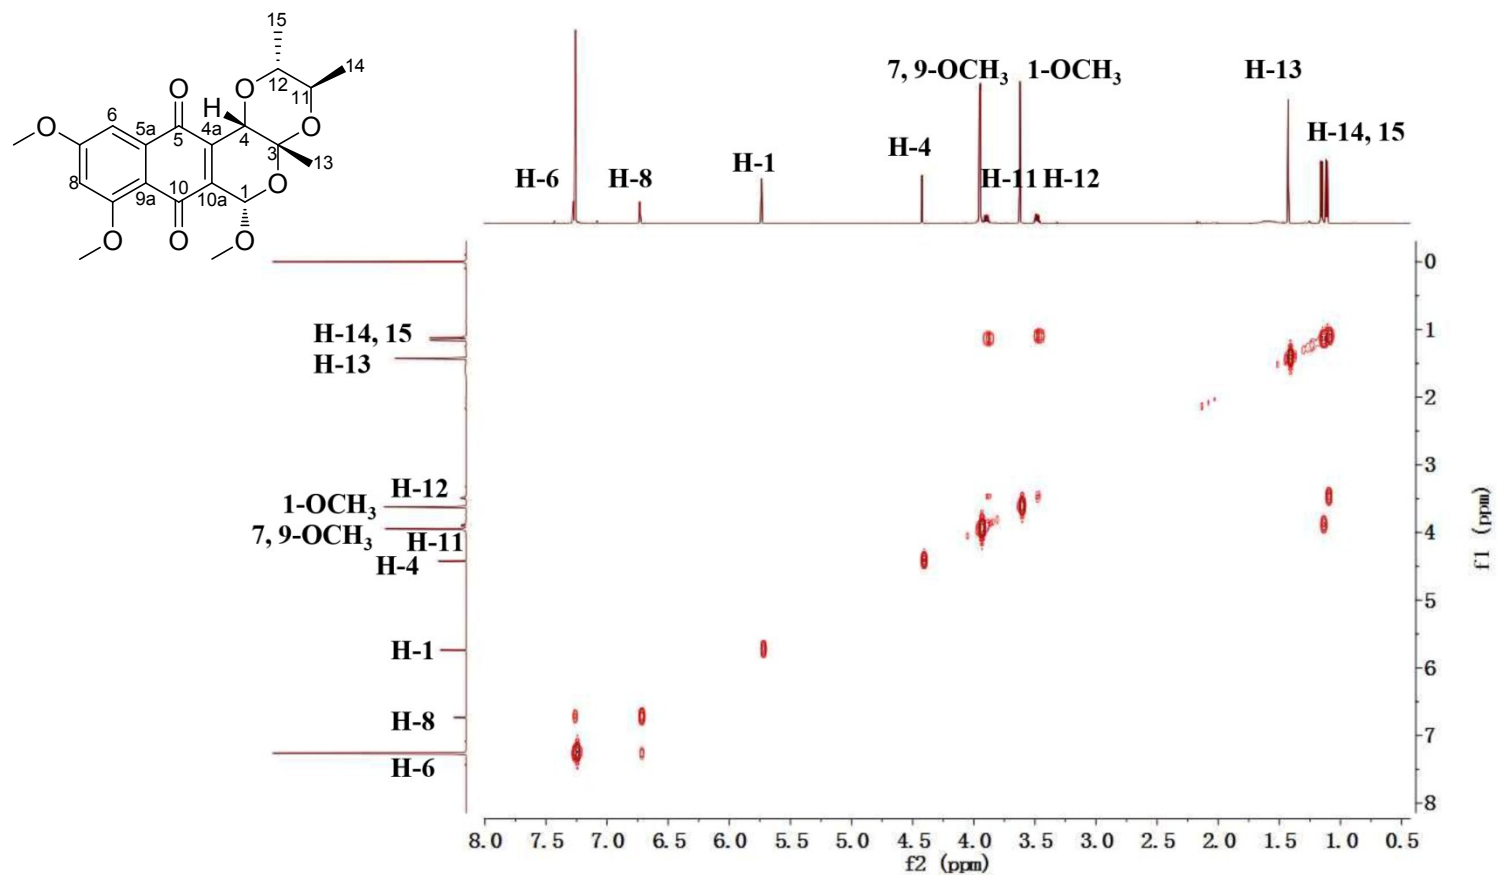

**Figure S17.** HMBC Spectrum of Pseudonectrin C (**3**; 600 MHz, CDCl<sub>3</sub>)

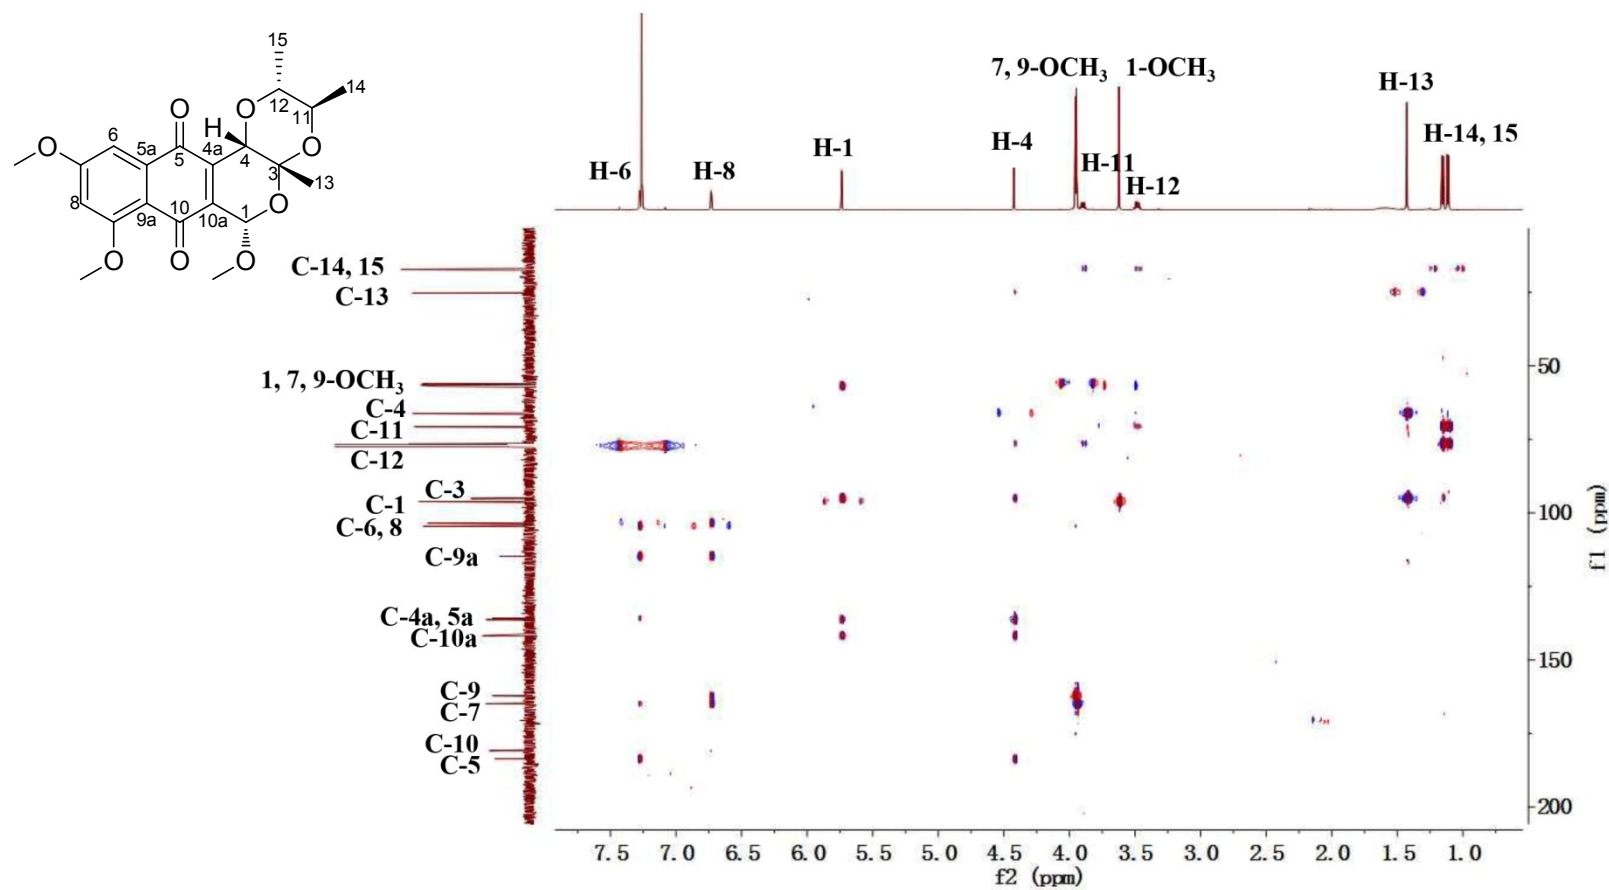

**Figure S18.** NOESY Spectrum of Pseudonectrin C (**3**; 600 MHz, CDCl<sub>3</sub>)

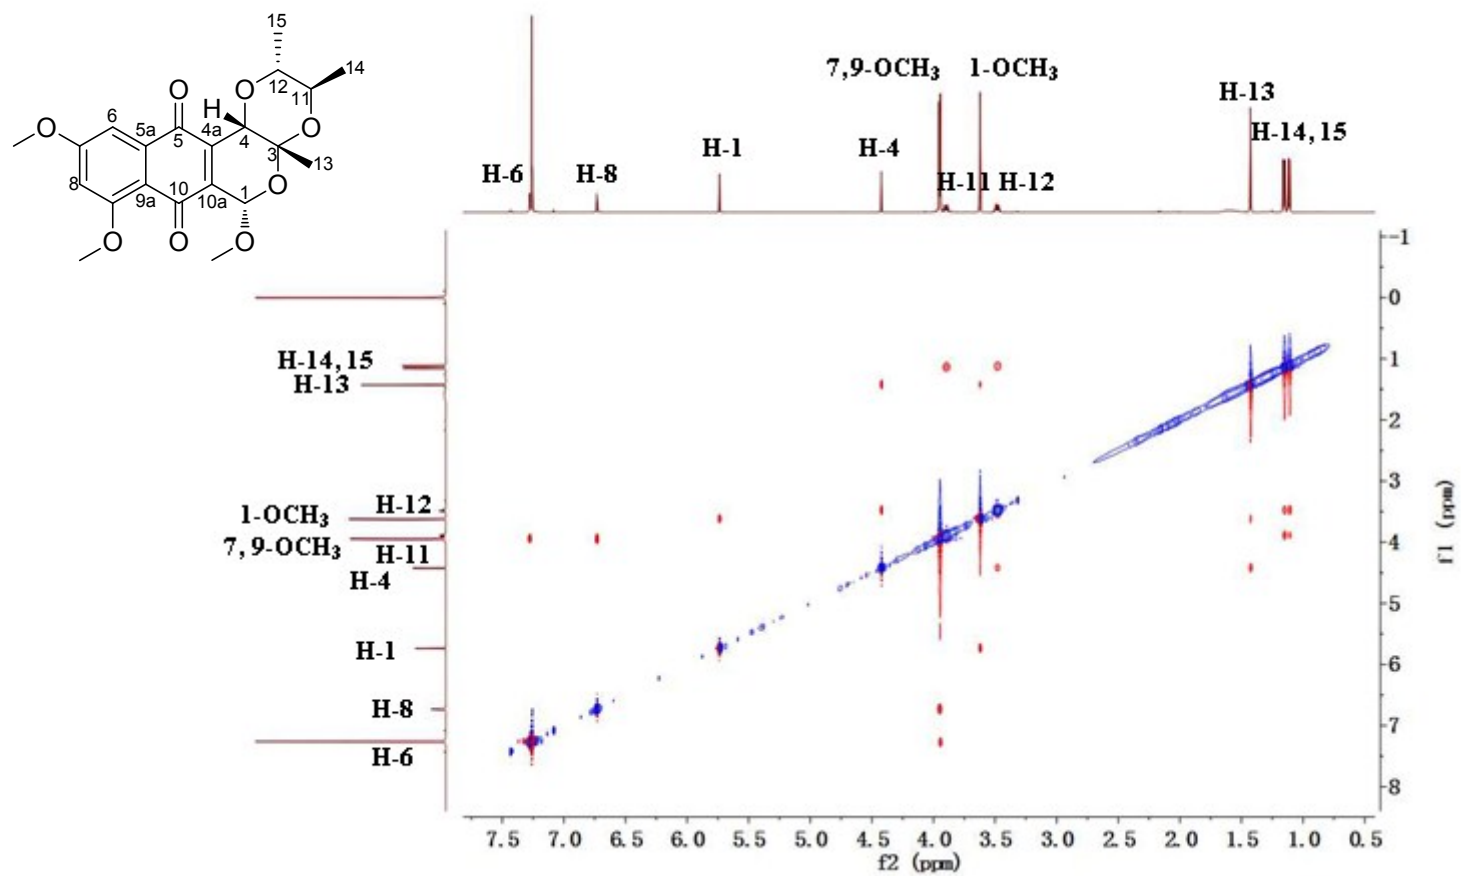

**Figure S19.**  $^1\text{H}$  NMR Spectrum of Pseudonectrin D (**4**; 600 MHz,  $\text{CDCl}_3$ )

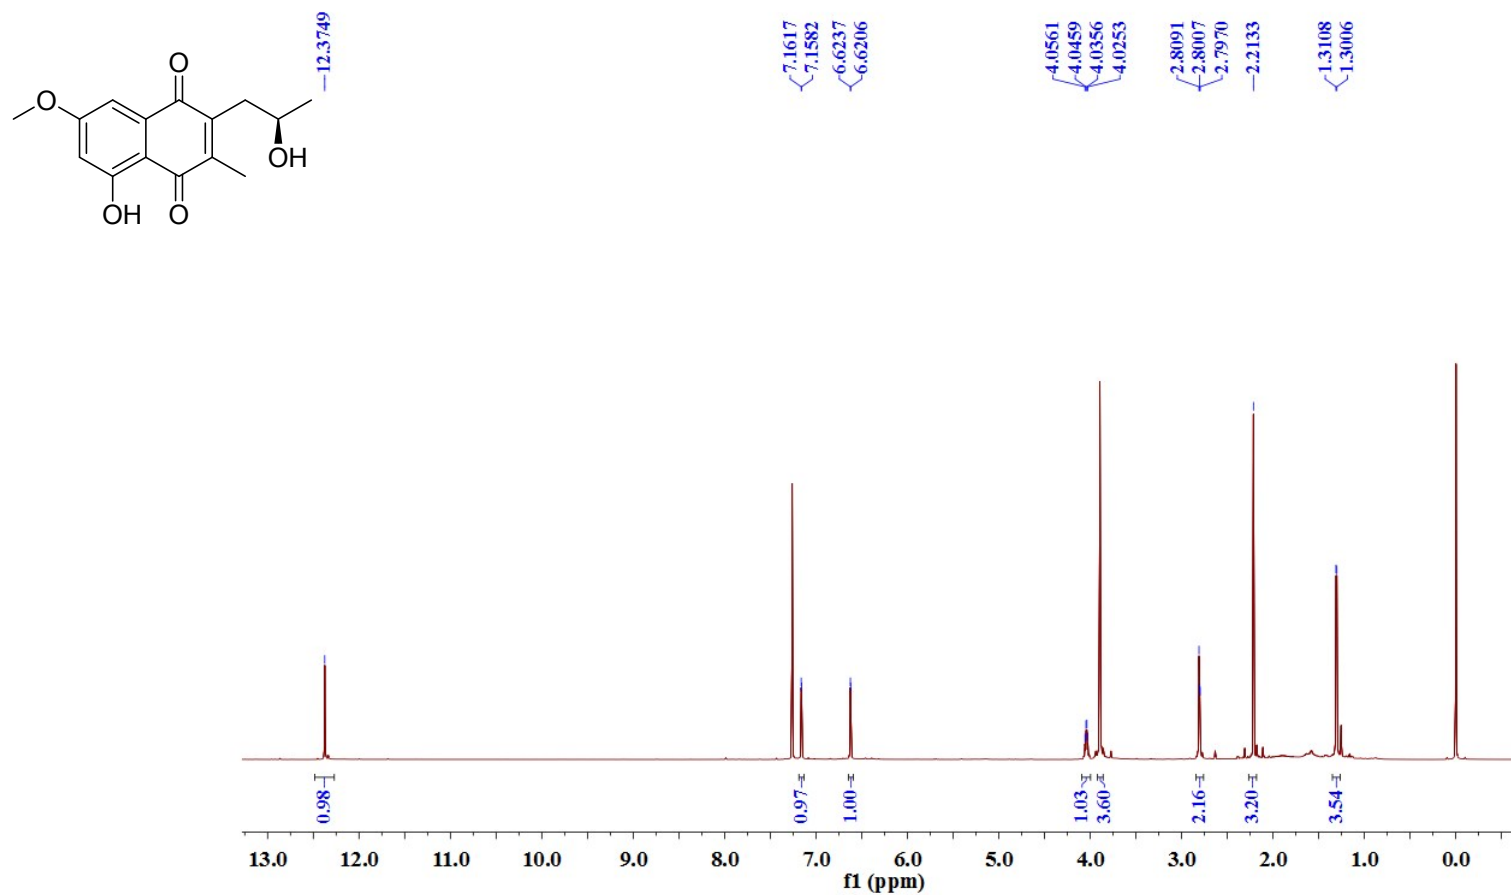

**Figure S20.**  $^{13}\text{C}$  NMR Spectrum of Pseudonectrin D (**4**; 150 MHz,  $\text{CDCl}_3$ )

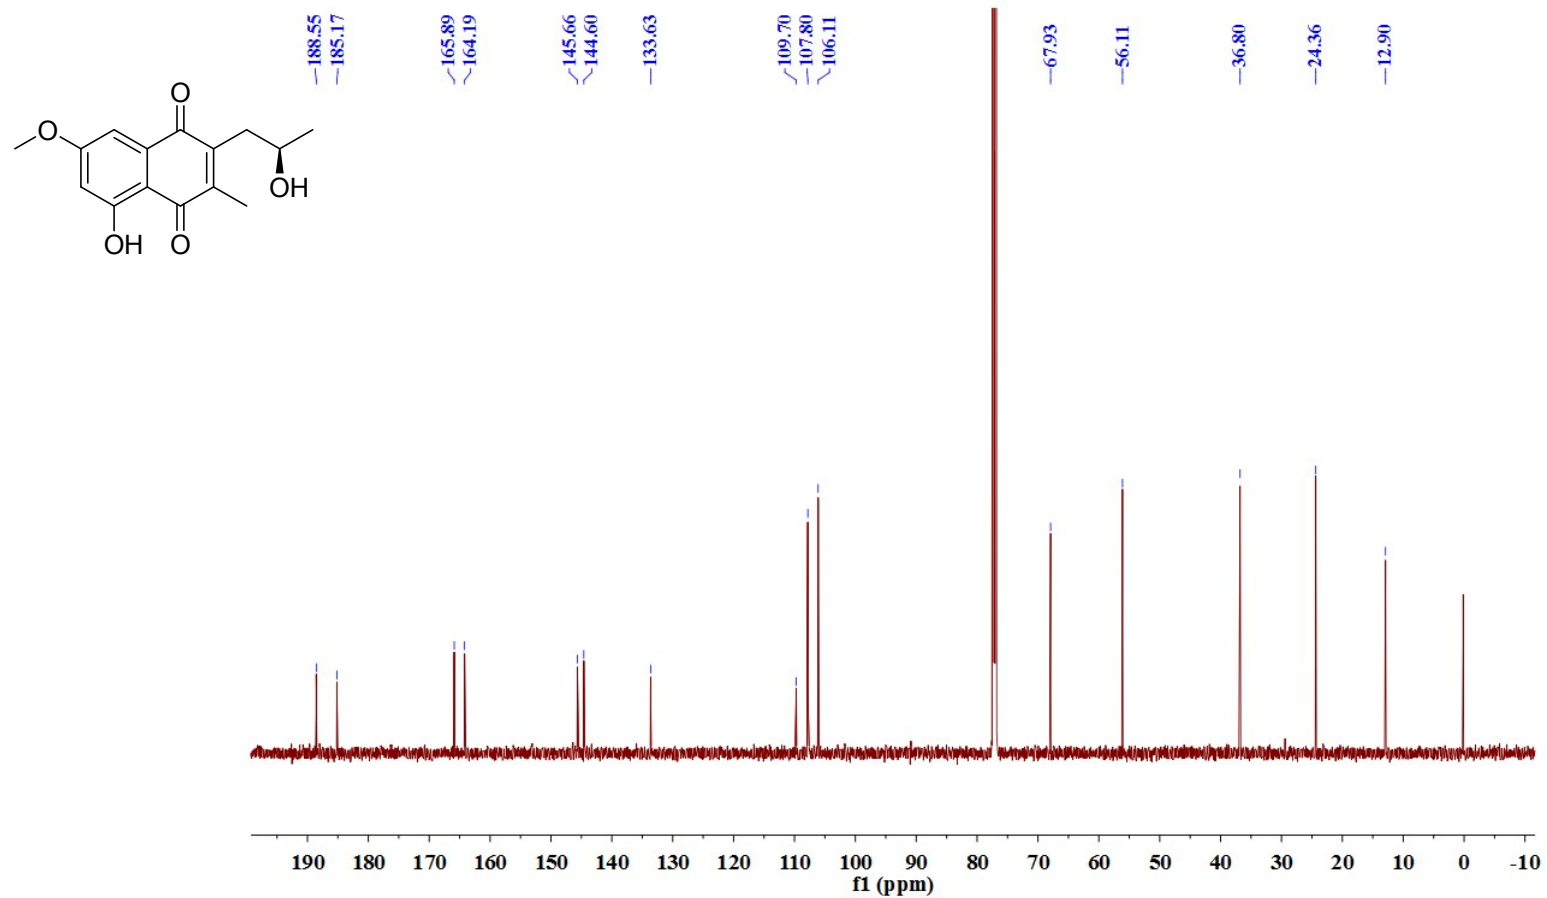



**Figure S21.** HSQC Spectrum of Pseudonectrin C (4; 600 MHz, CDCl<sub>3</sub>)

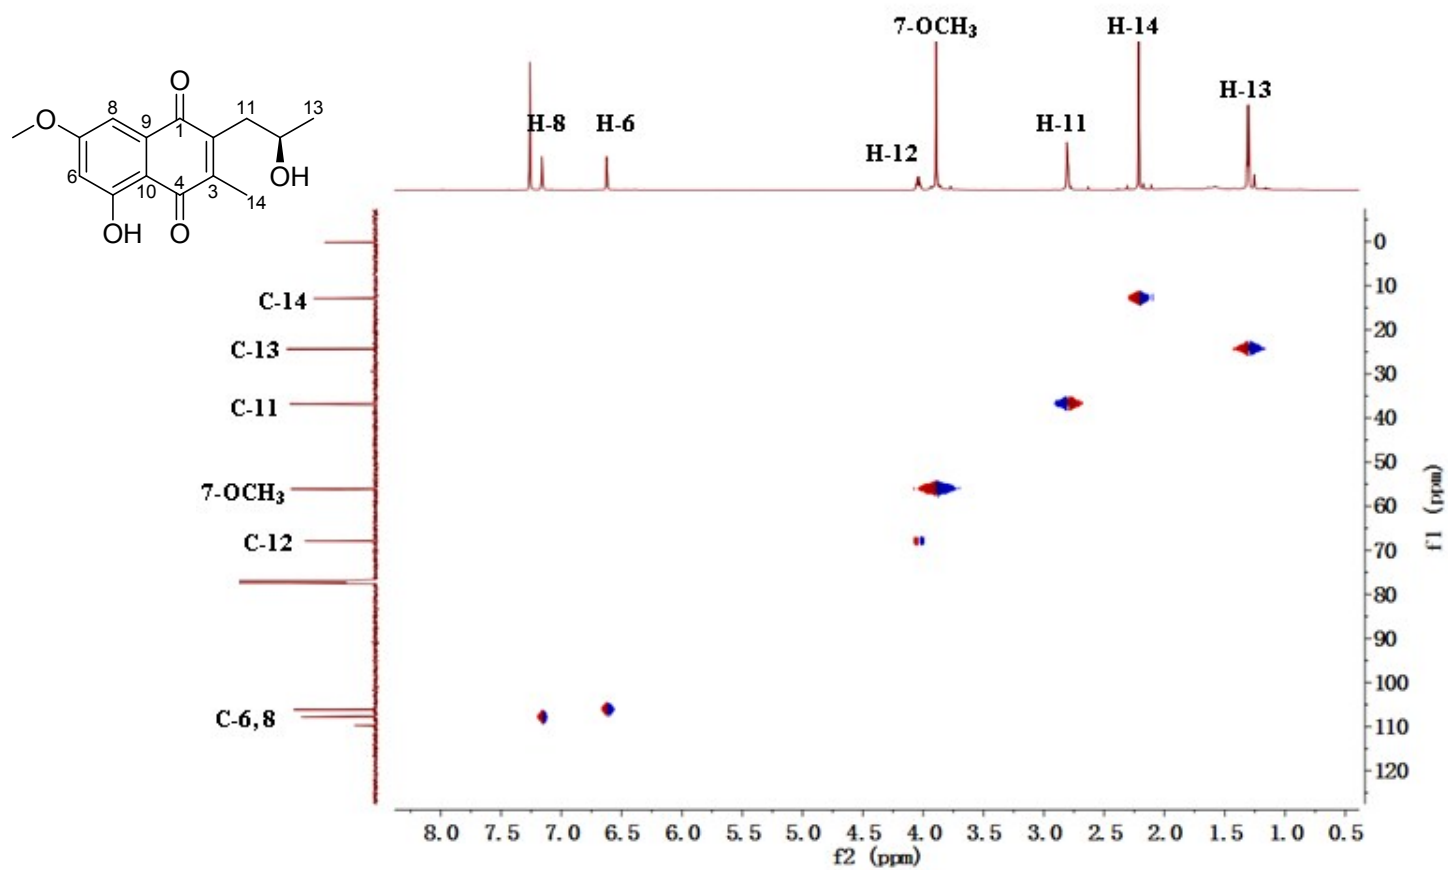

**Figure S22.**  $^1\text{H}$ - $^1\text{H}$  COSY Spectrum of Pseudonectrin D (**4**; 600 MHz,  $\text{CDCl}_3$ )

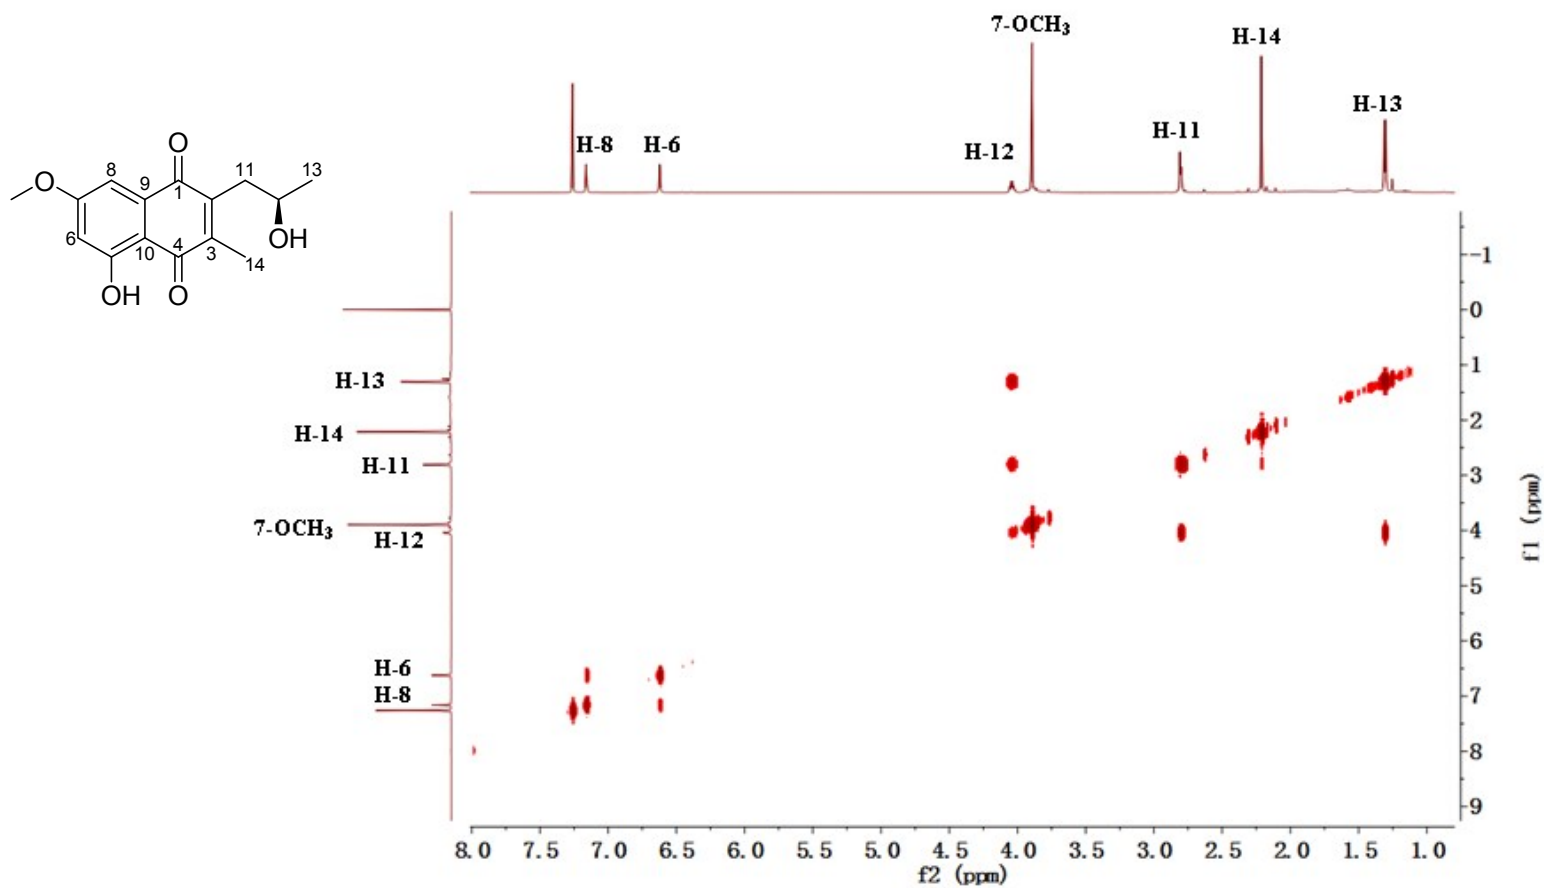

**Figure S23.** HMBC Spectrum of Pseudonectrin D (**4**; 600 MHz, CDCl<sub>3</sub>)

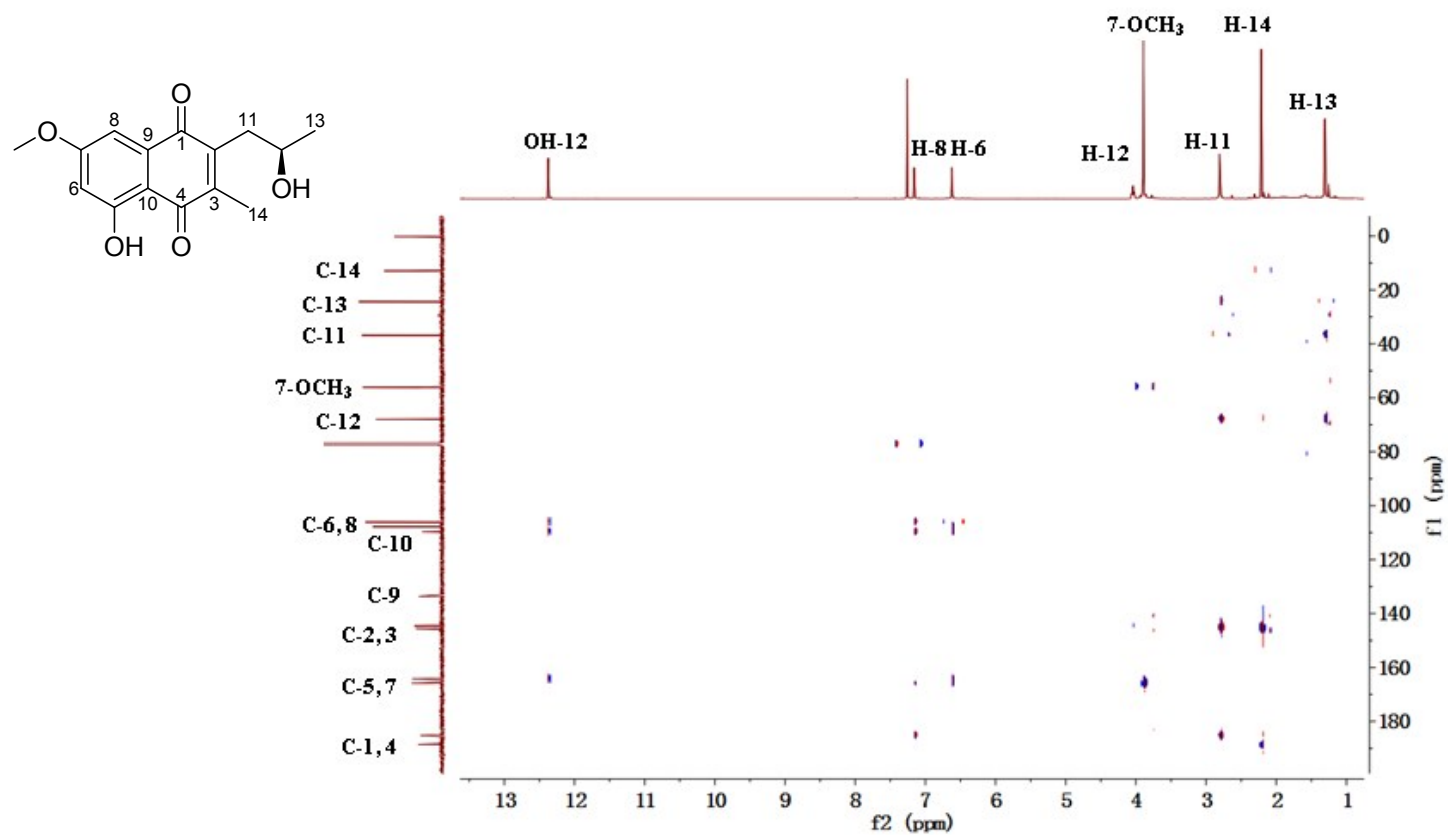

**Figure S24.** NOESY Spectrum of Pseudonectrin D (4; 600 MHz, CDCl<sub>3</sub>)

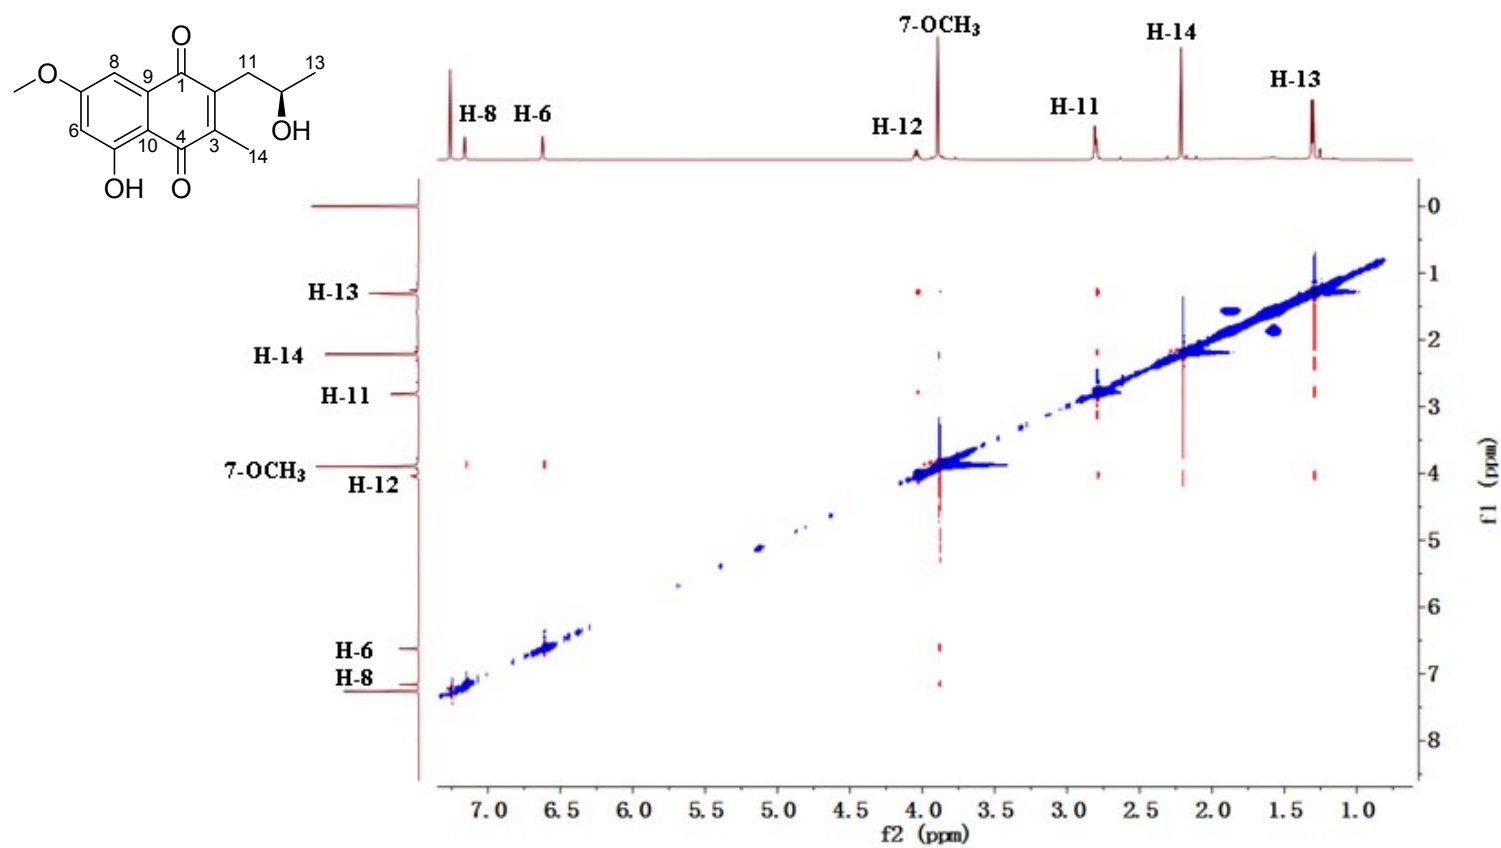

**Figure S25.** Relative Configurations and the Optimized Conformers for **1**

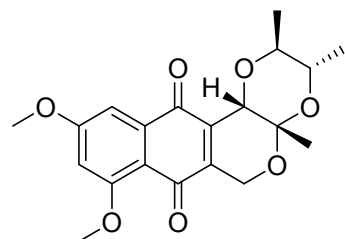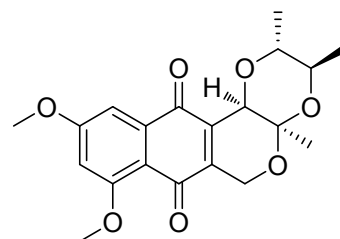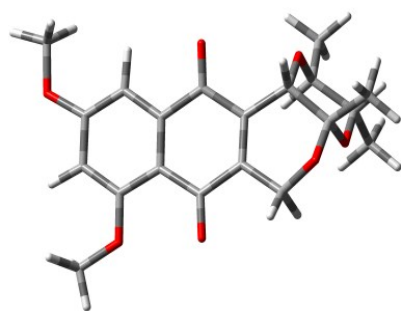

**1a**

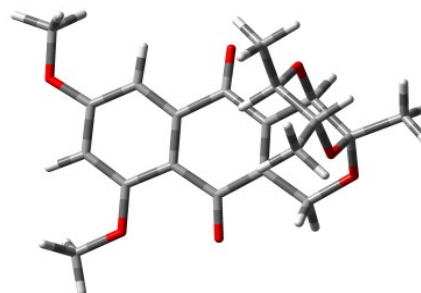

**1b**

**Figure S26.** Relative Configurations and the Optimized Conformers for **2**

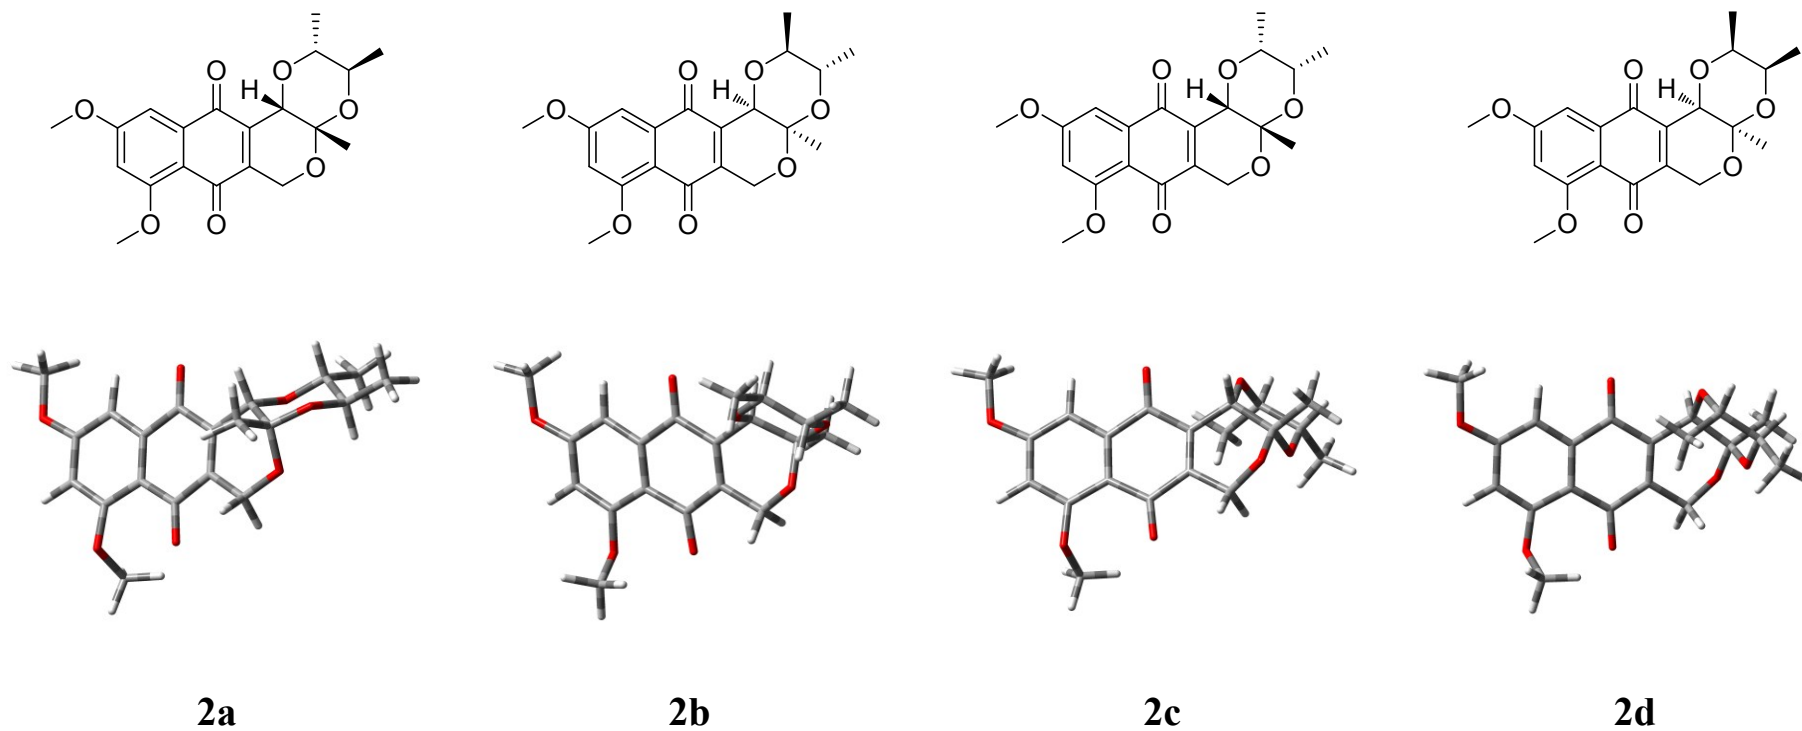

**Figure S27.** Relative Configurations and the Optimized Conformers for **3**

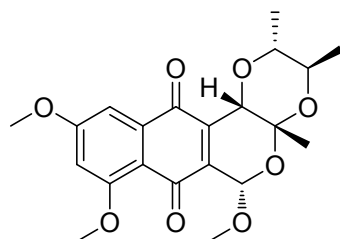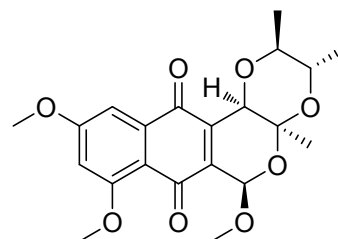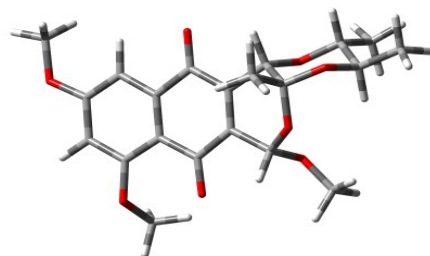

**3a**

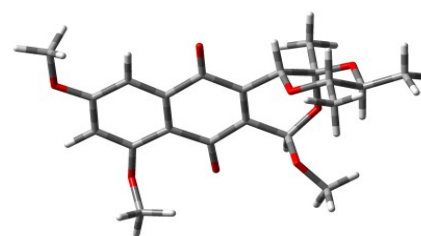

**3b**

**Figure S28.** UV Spectrum of Pseudonectrin A (1) in MeOH

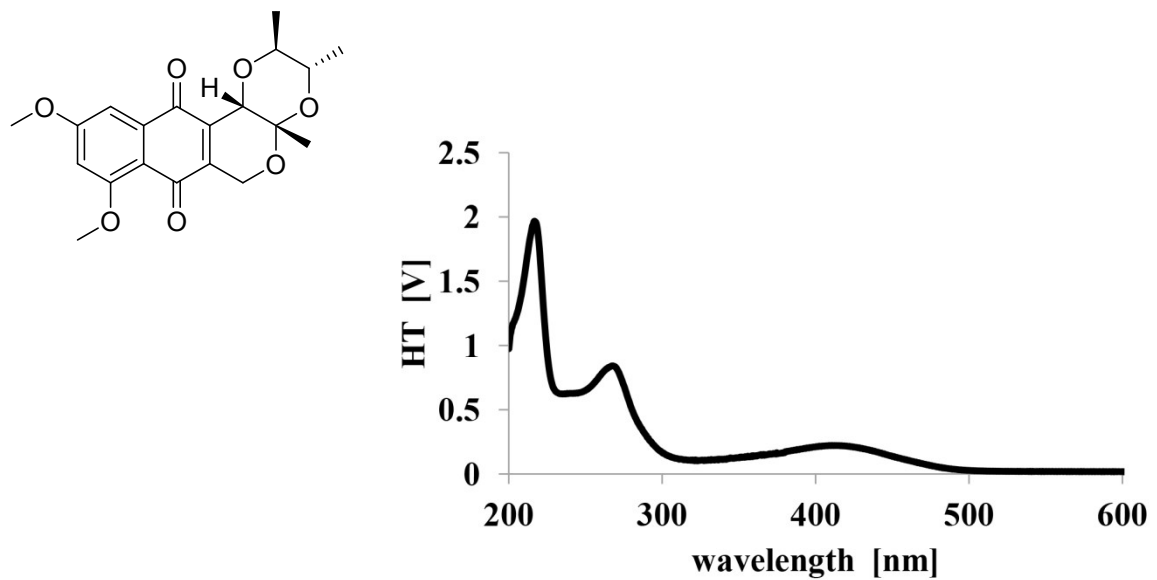



**Figure S29.** UV Spectrum of Pseudonectrin B (2) in MeOH

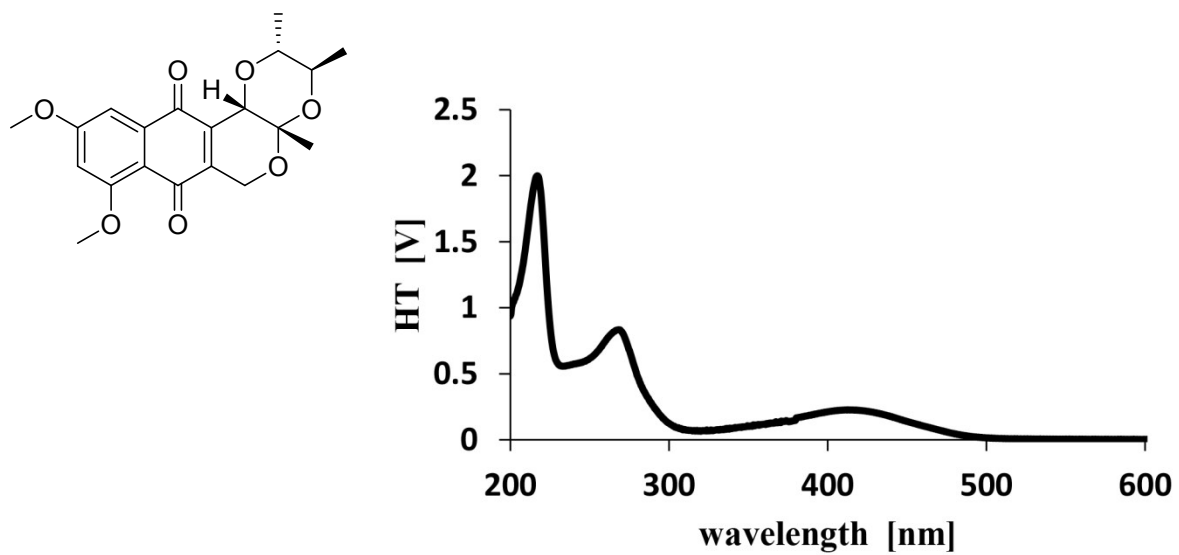

**Figure S30.** UV Spectrum of Pseudonectrin C (**3**) in MeOH

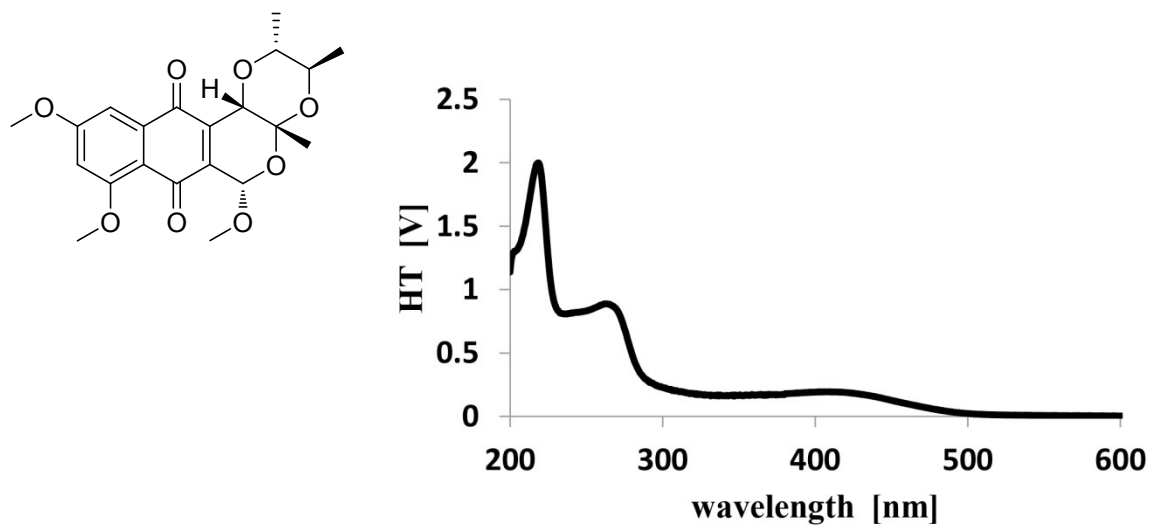

**Figure S31.** UV Spectrum of Pseudonectrin D (4) in MeOH

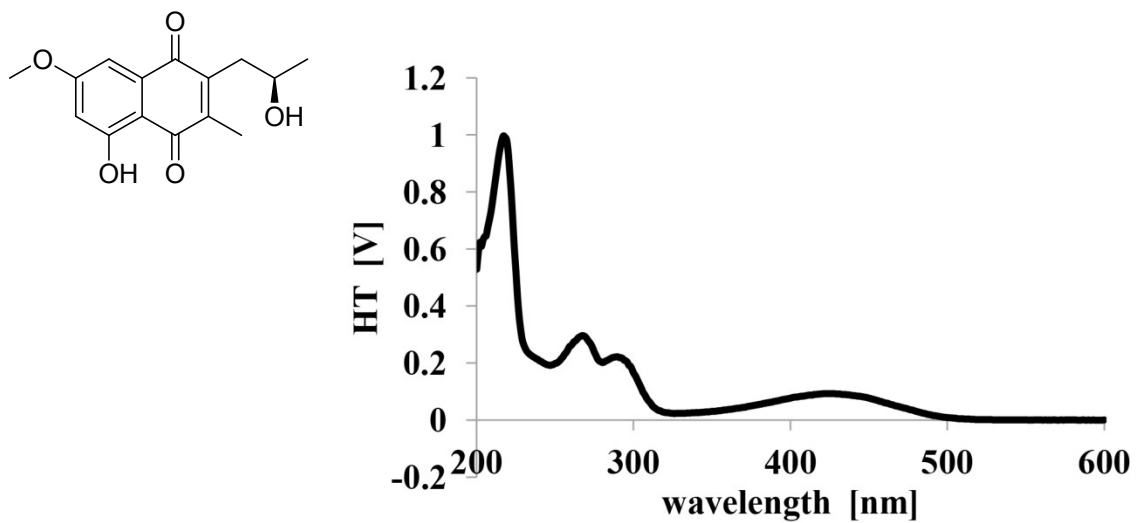

**Figure S32.** CD Spectrum of Pseudonectrin A (1) in MeOH

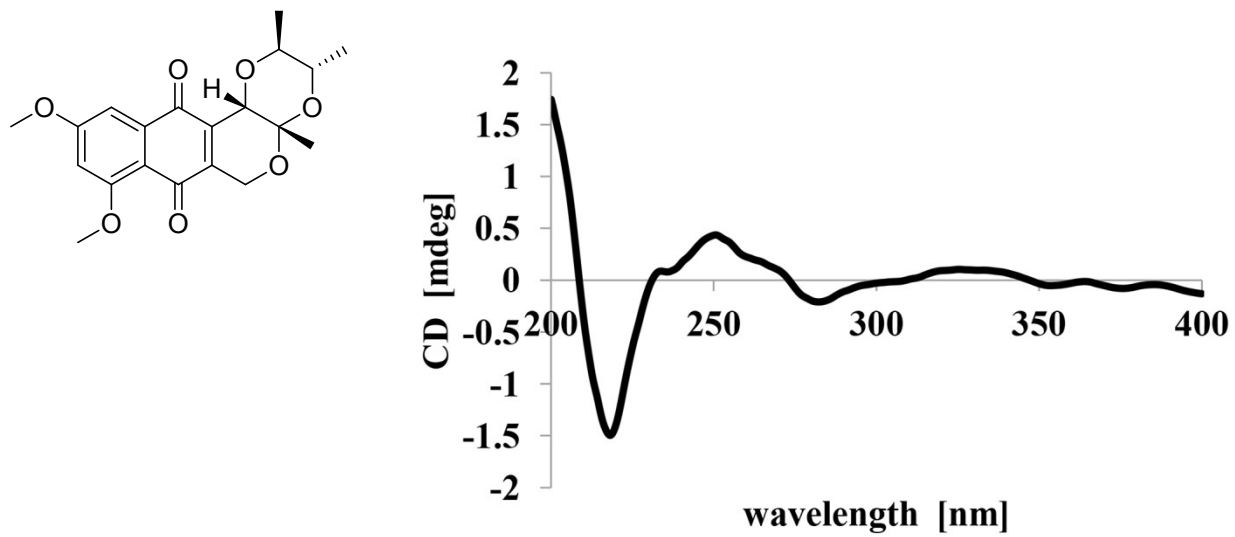

**Figure S33.** CD Spectrum of Pseudonectrin B (2) in MeOH

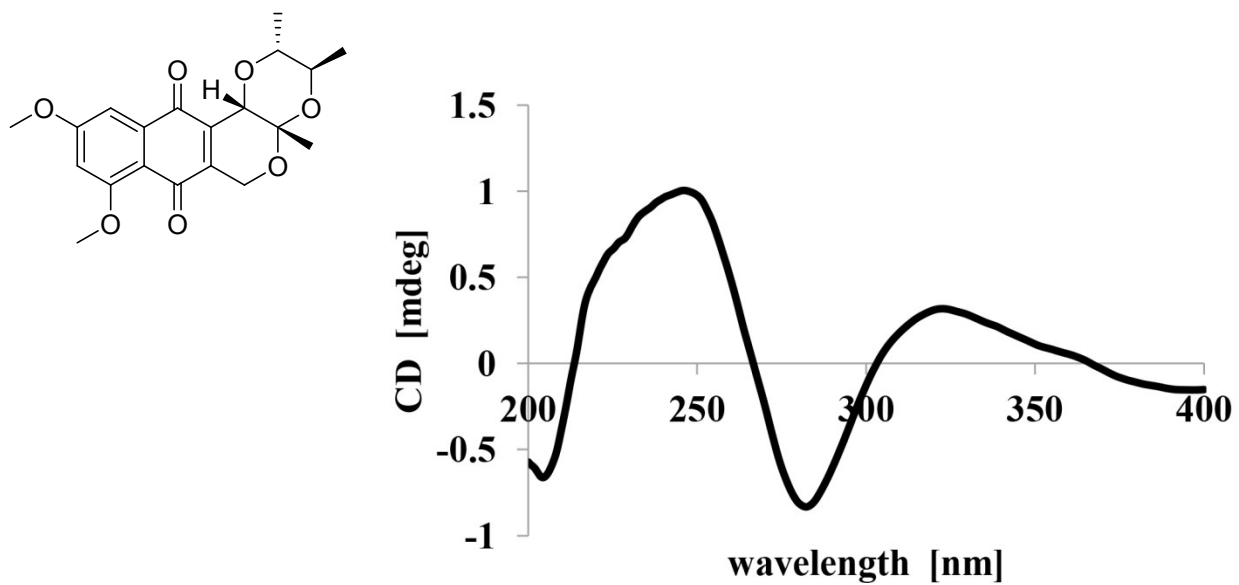

**Figure S34.** CD Spectrum of Pseudonectrin C (**3**) in MeOH

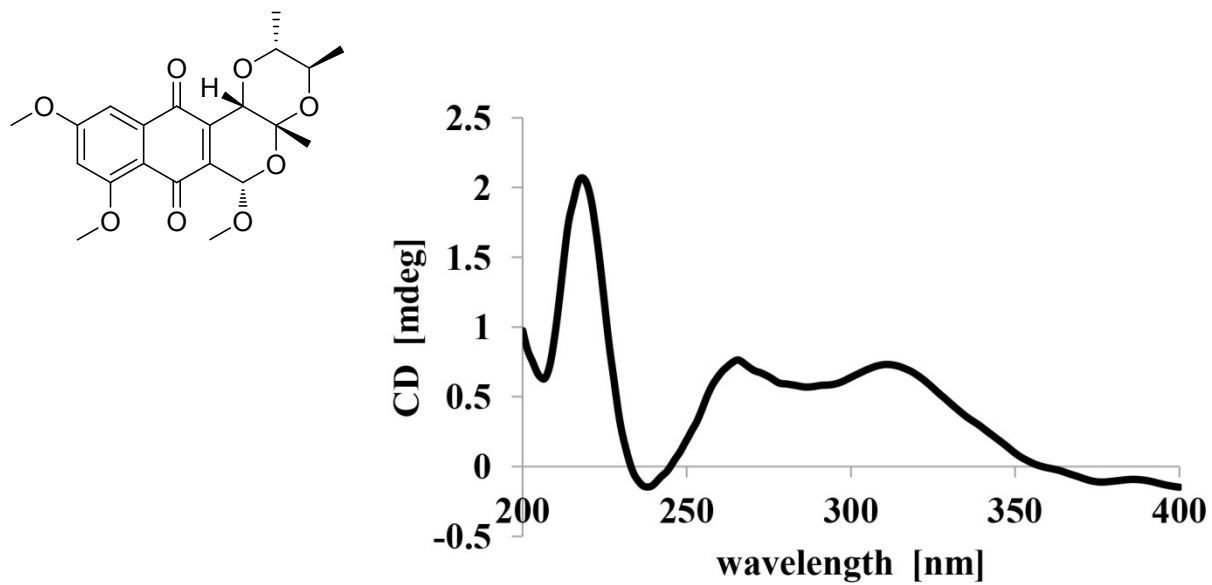

**Figure S35.** CD Spectrum of Pseudonectrin D (4) in MeOH

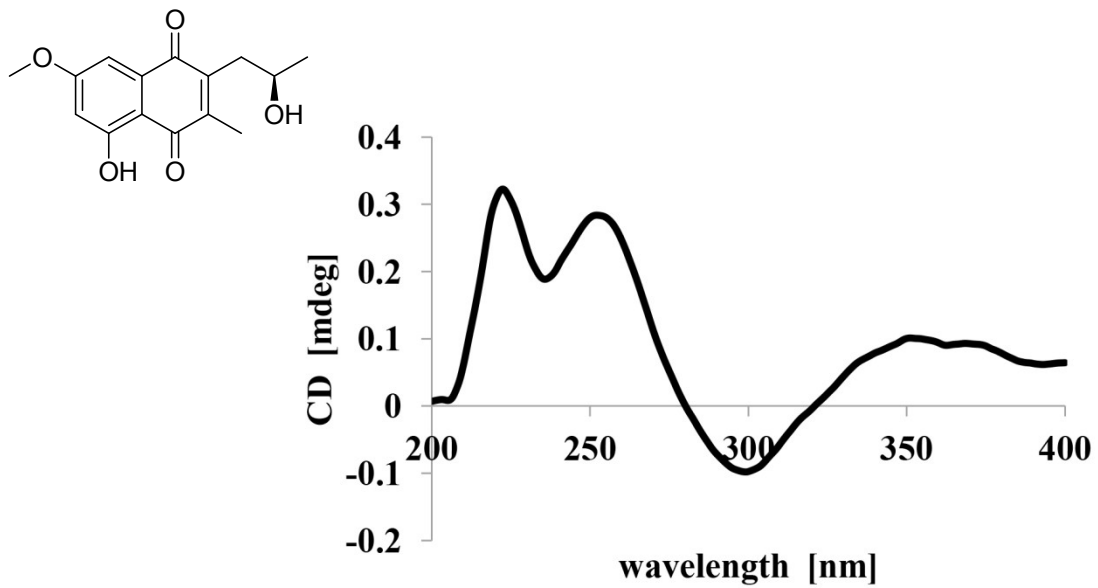

Figure S36. IR Spectrum of Pseudonectrin A (1)

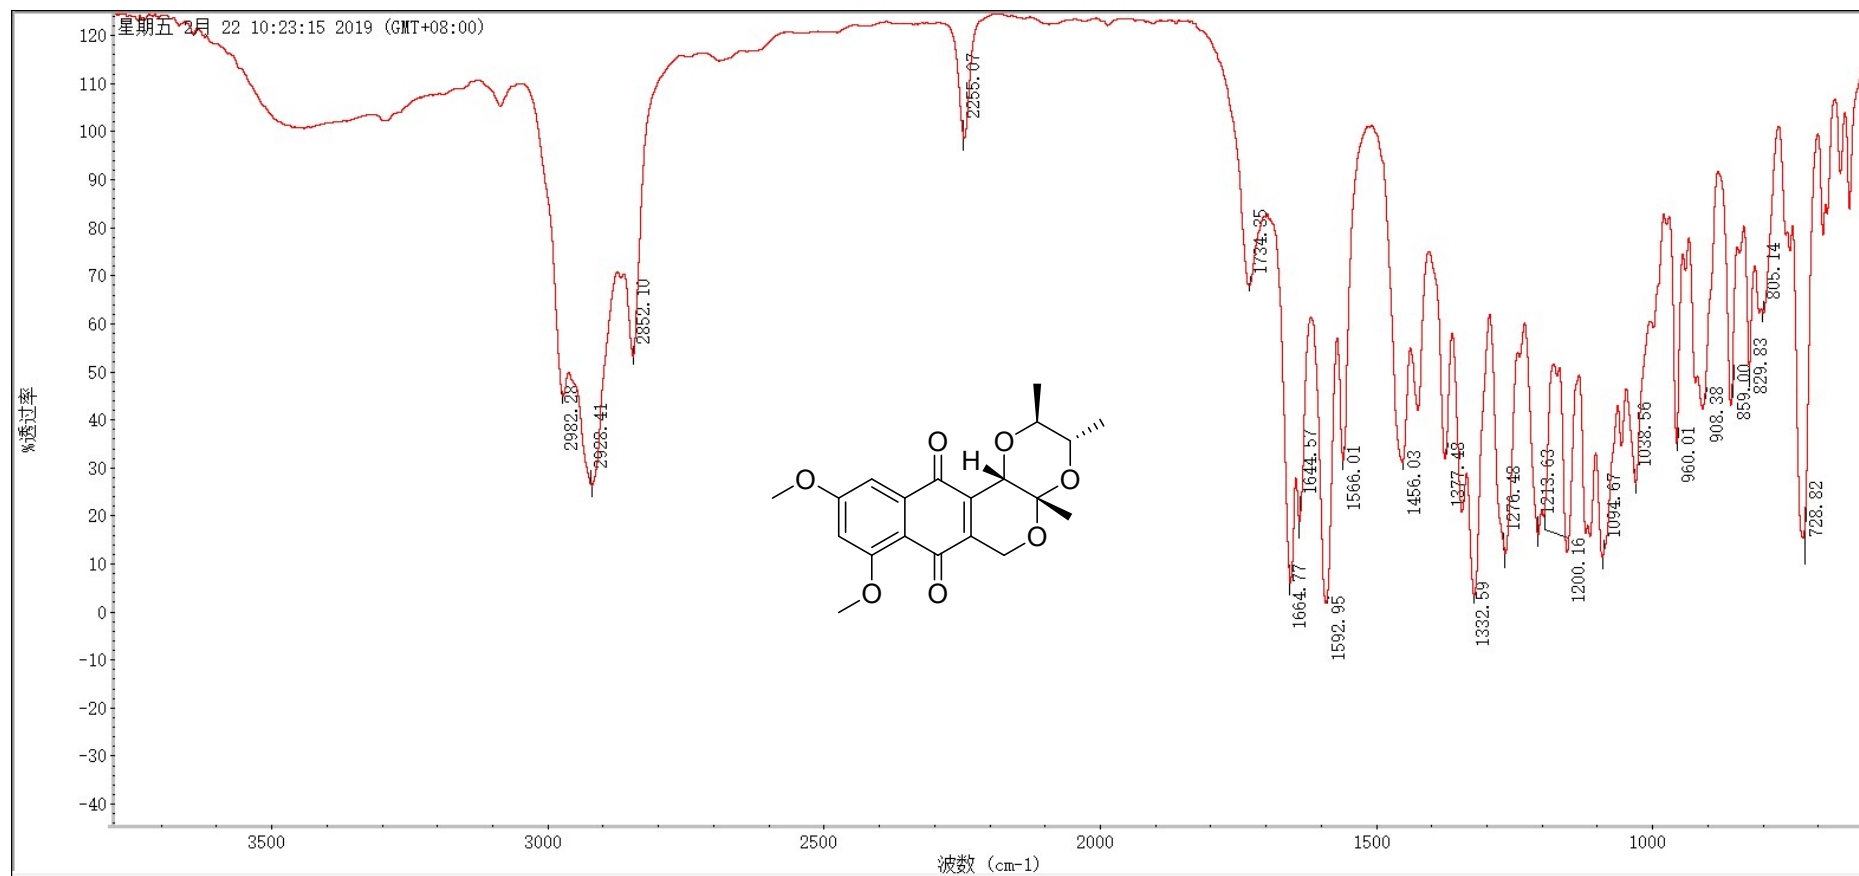



**Figure S37.** IR Spectrum of Pseudonectrin B (2)

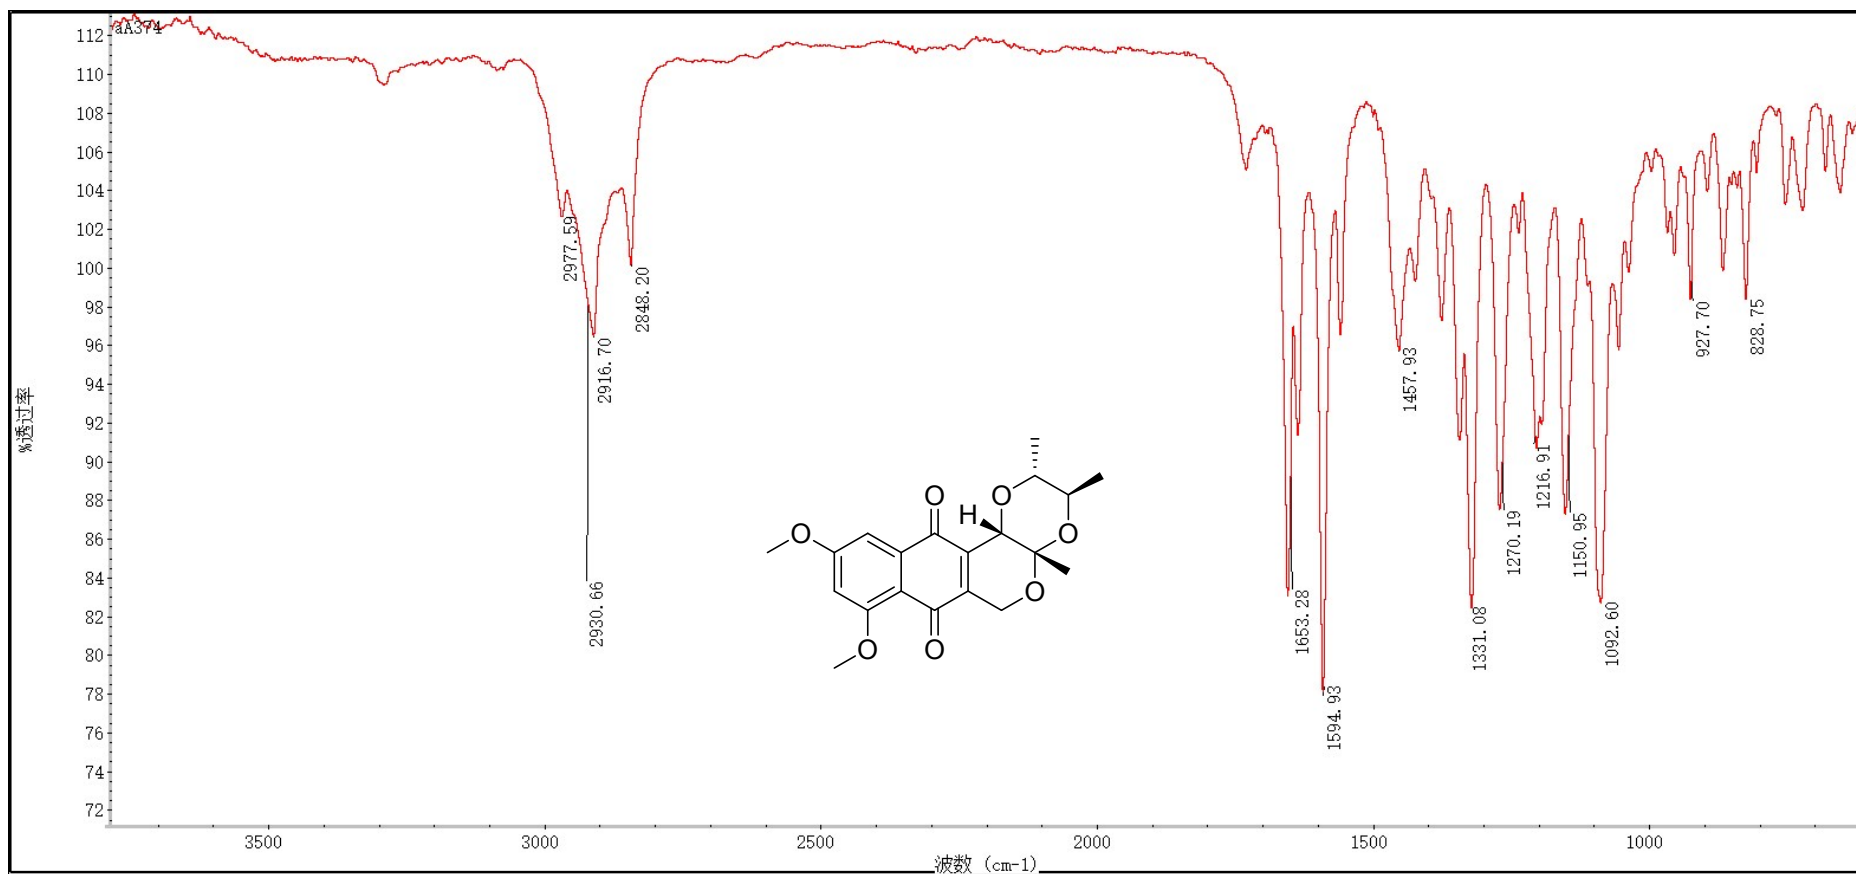

Figure S38. IR Spectrum of Pseudonectrin C (3)

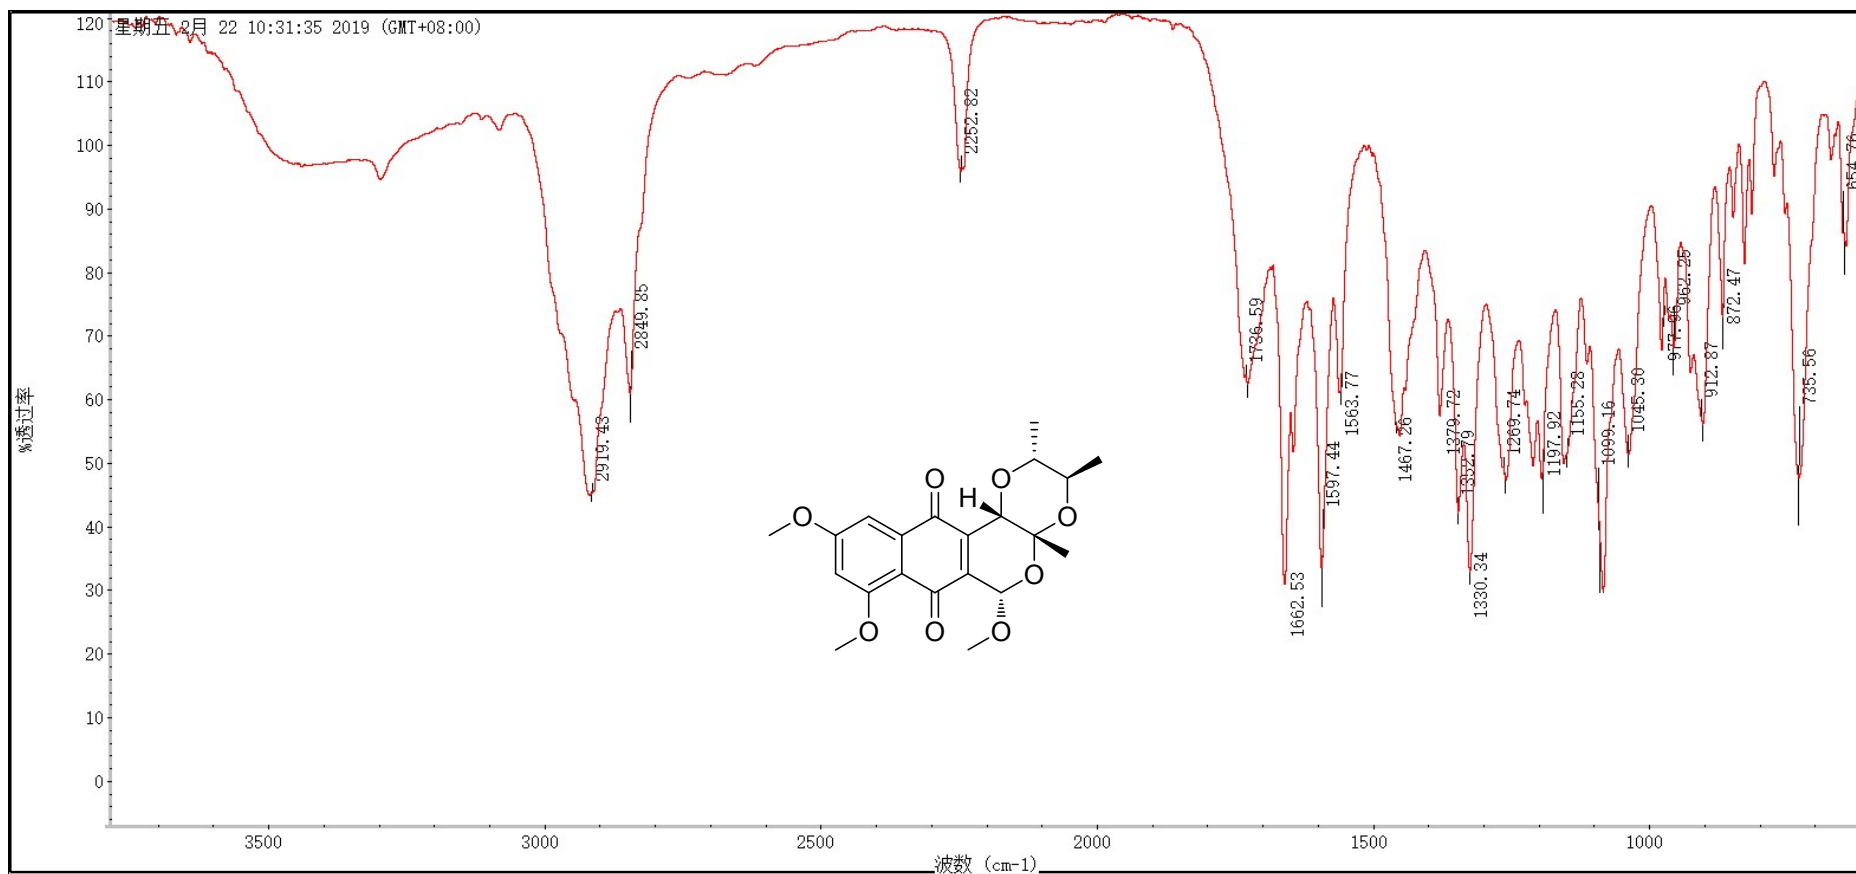

Figure S39. IR Spectrum of Pseudonecetrin D (4)

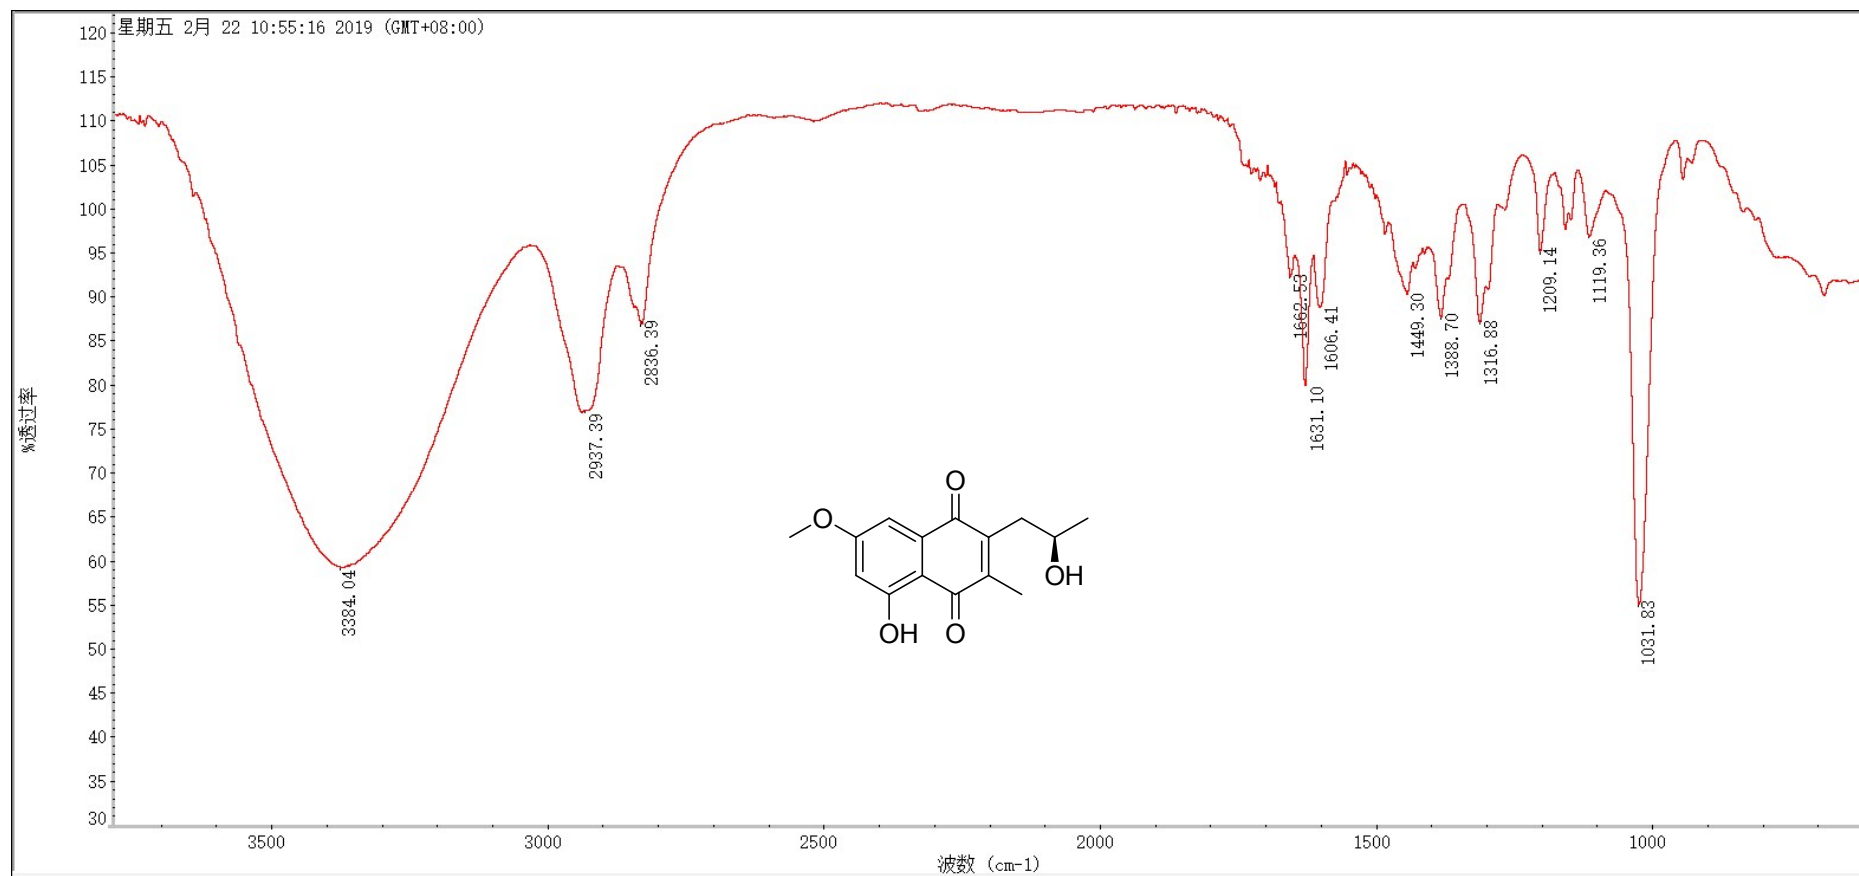

**Figure S40.** HRESIMS Spectrum of Pseudonectrin A (1)

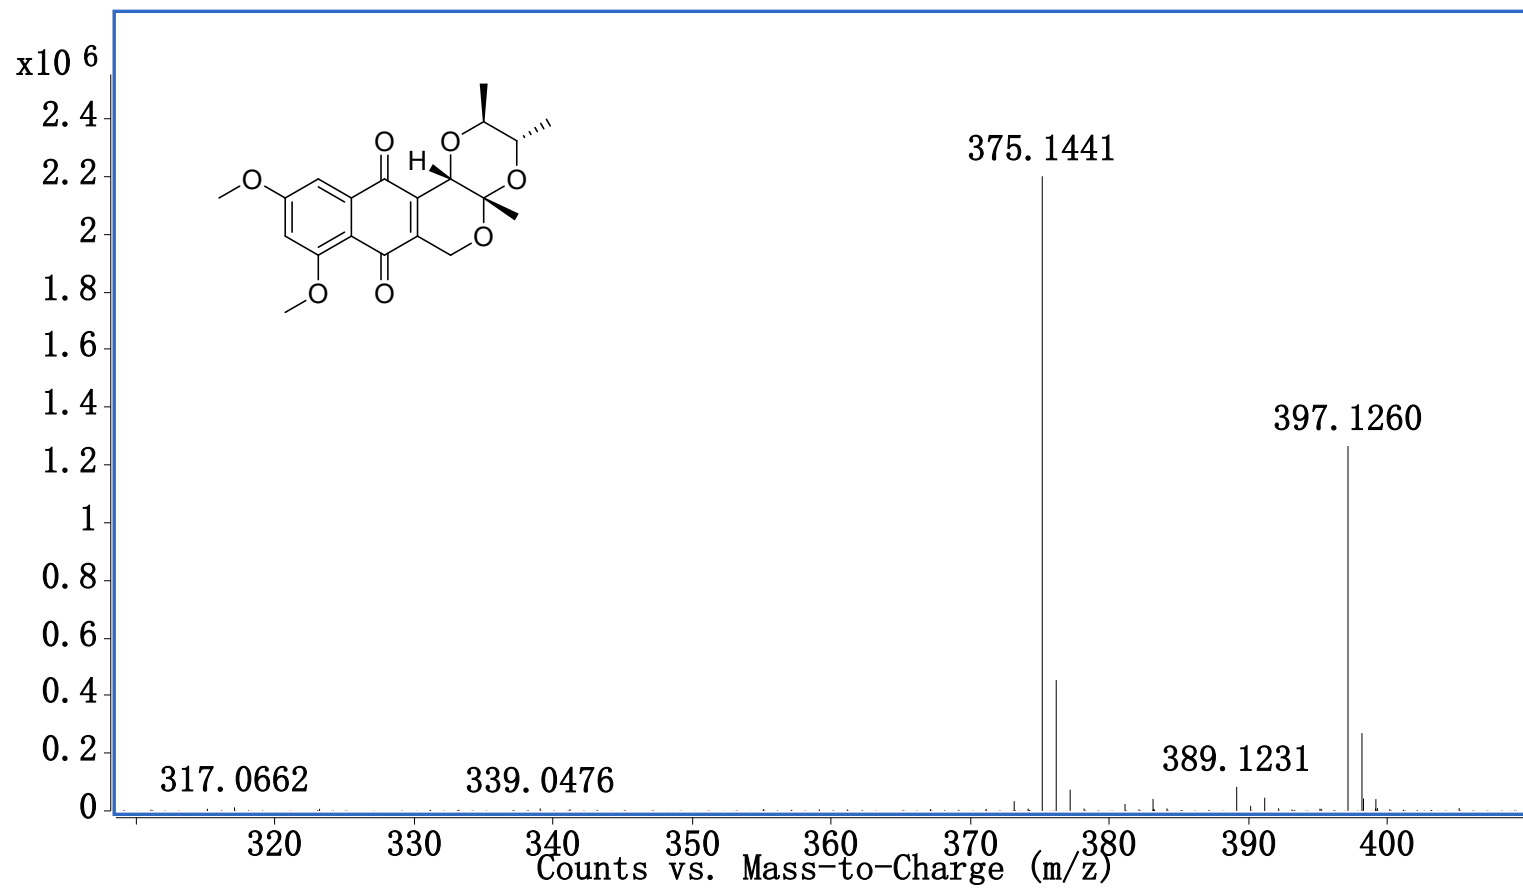

**Figure S41.** HRESIMS Spectrum of Pseudonectrin B (2)

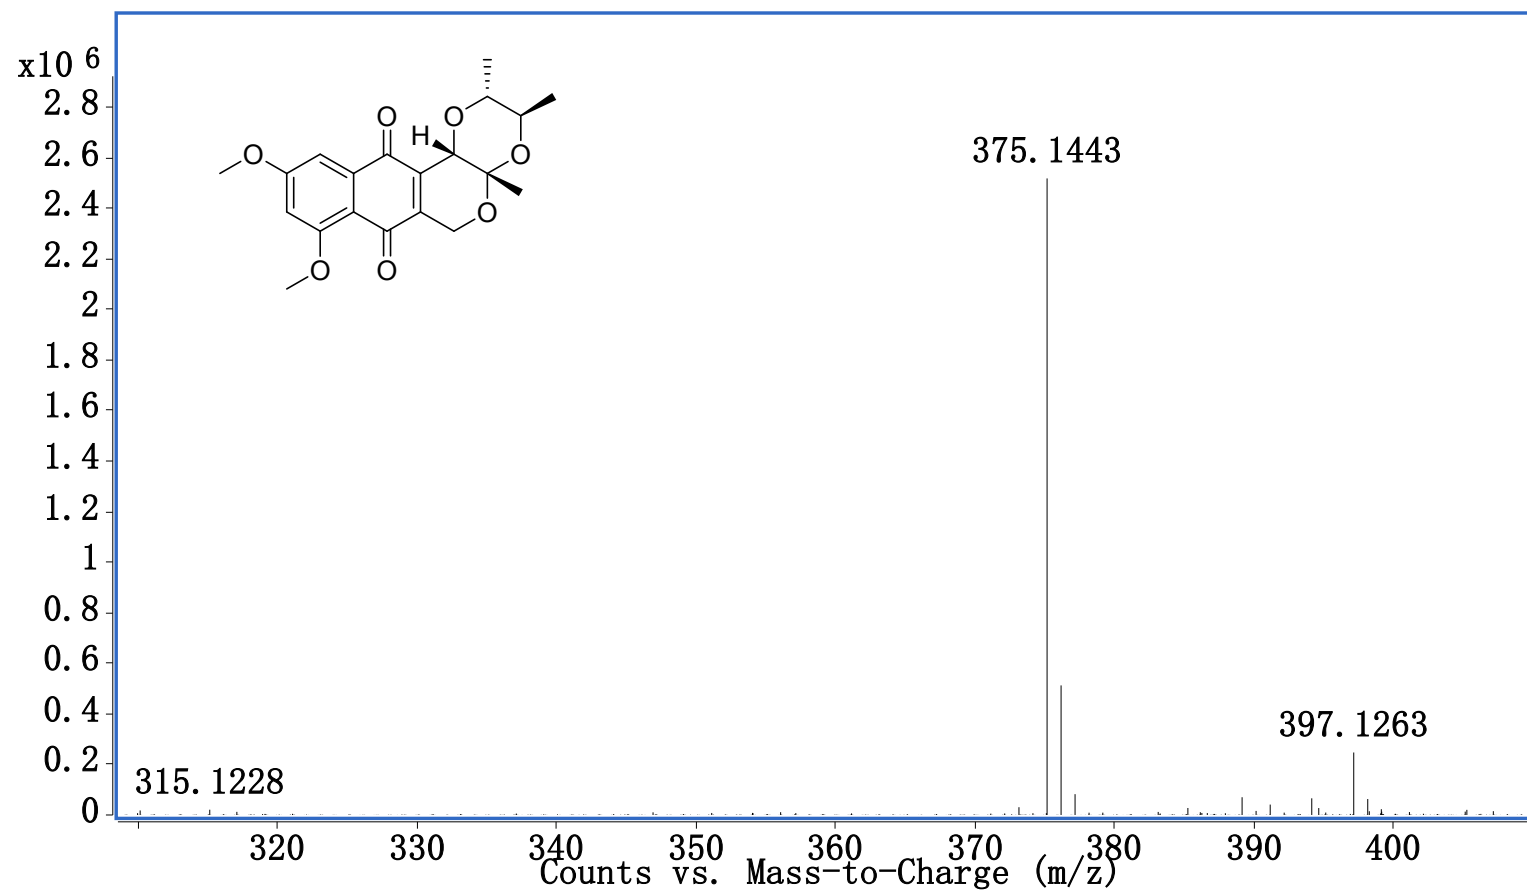

**Figure S42.** HRESIMS Spectrum of Pseudonectrin C (3)

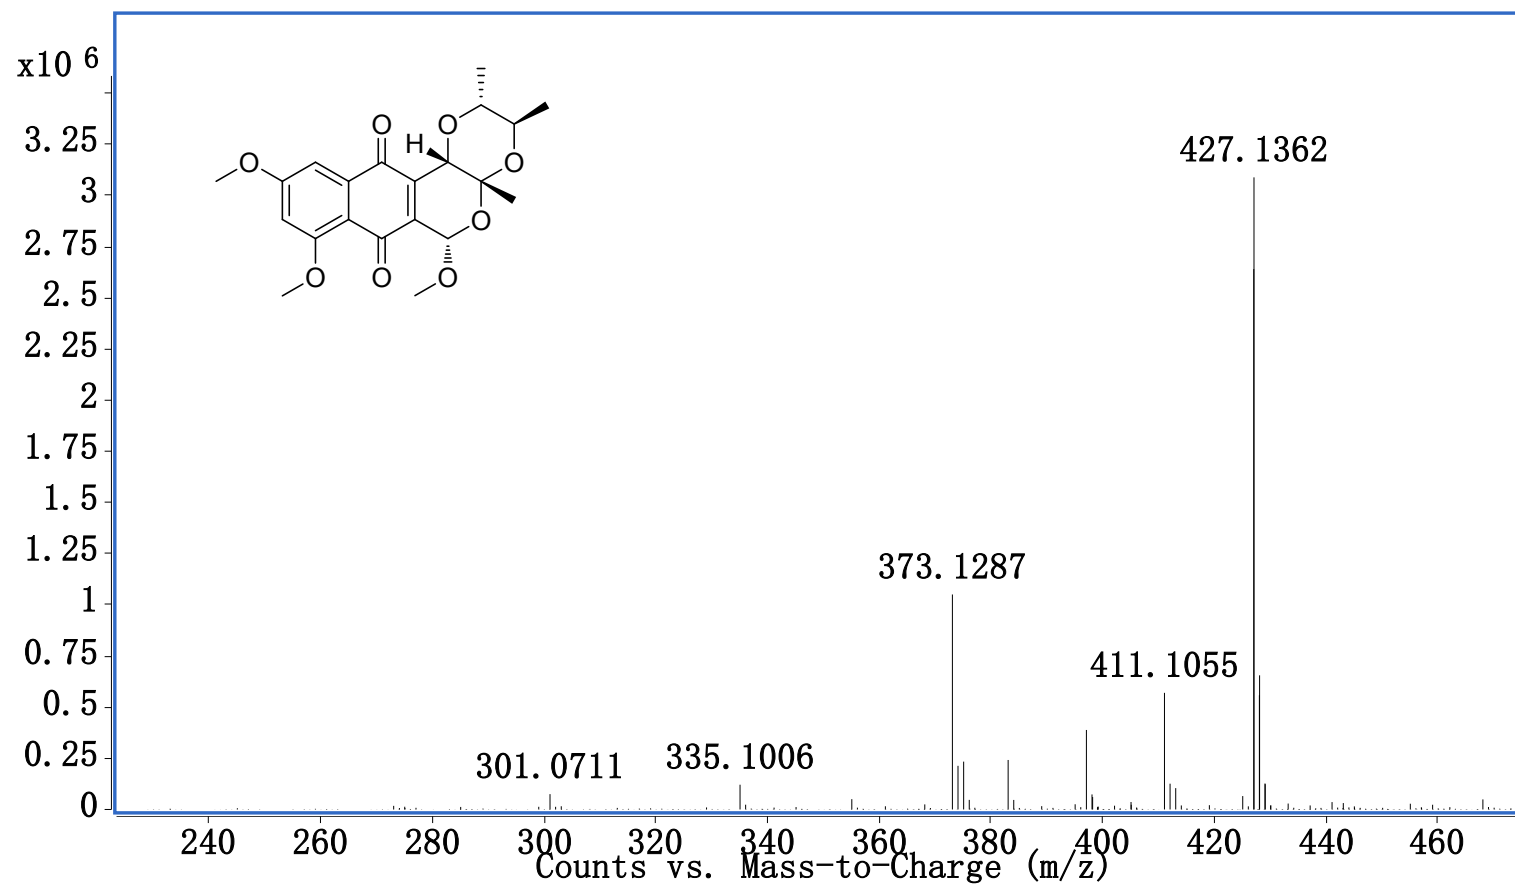

**Figure S43 . HRESIMS Spectrum of Pseudonectrin D (4)**

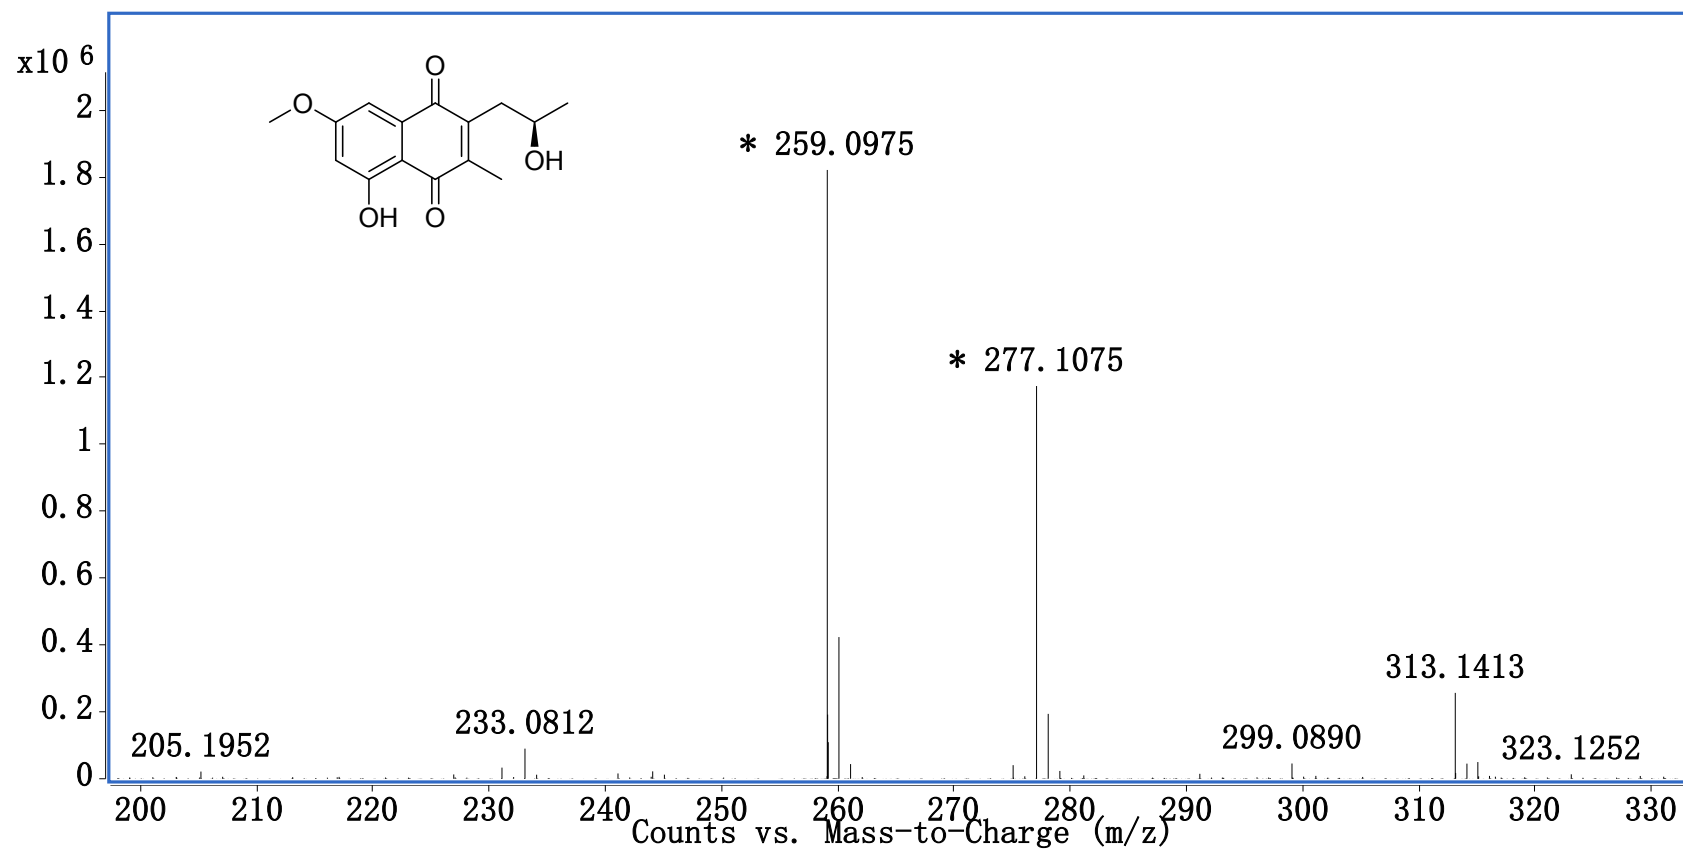

**Figure S44.**  $^1\text{H}$  NMR Spectrum of 2-Acetyl-5,7-dimethoxy-3-methyl-1,4-naphthoquinone (**5**; 400 MHz,  $\text{CDCl}_3$ )

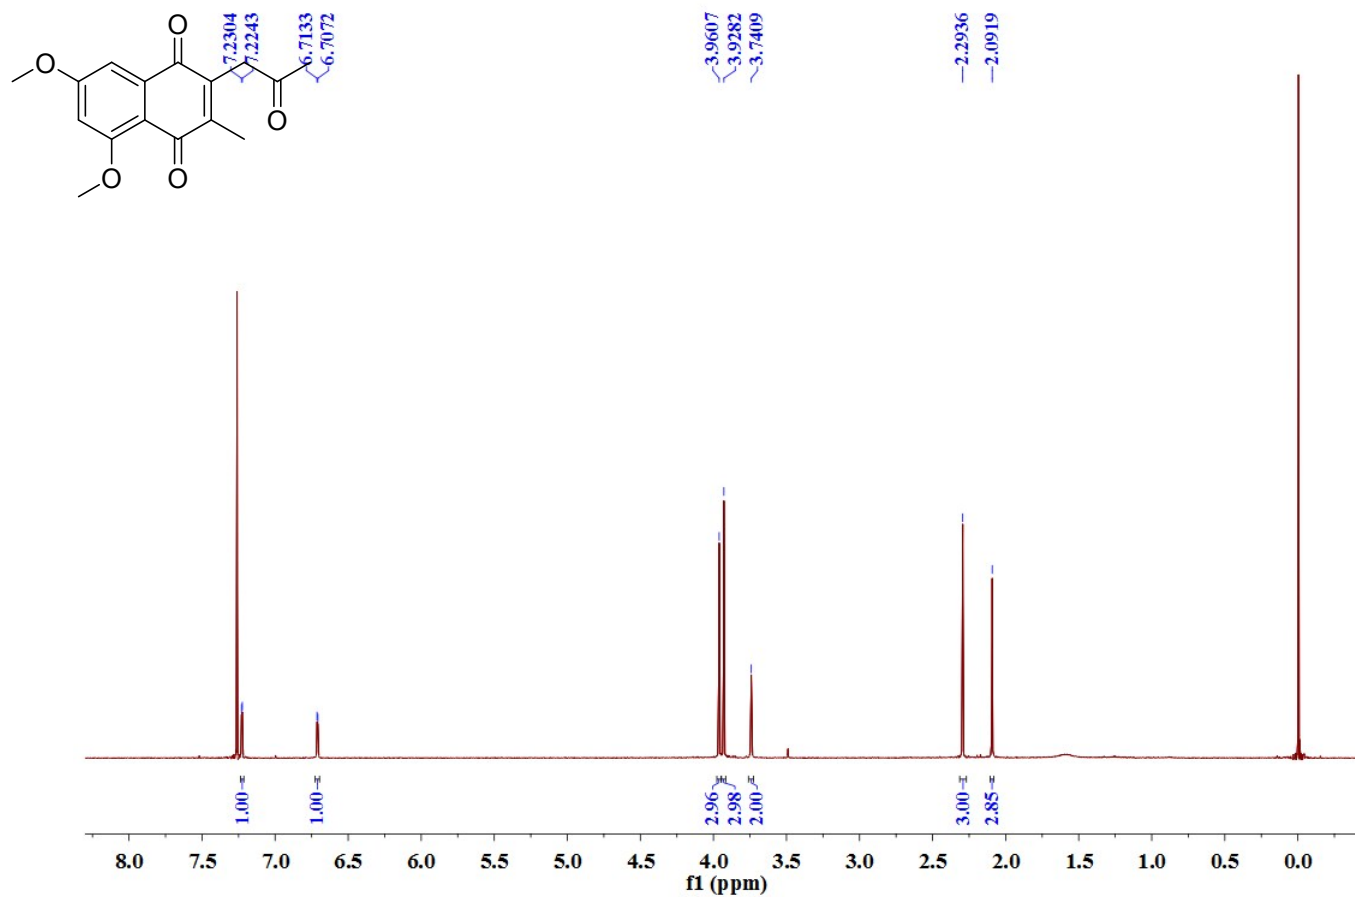



**Figure S45.**  $^{13}\text{C}$  NMR Spectrum of 2-Acetyl-5,7-dimethoxy-3-methyl-1,4-naphthoquinone (**5**; 150 MHz,  $\text{CDCl}_3$ )

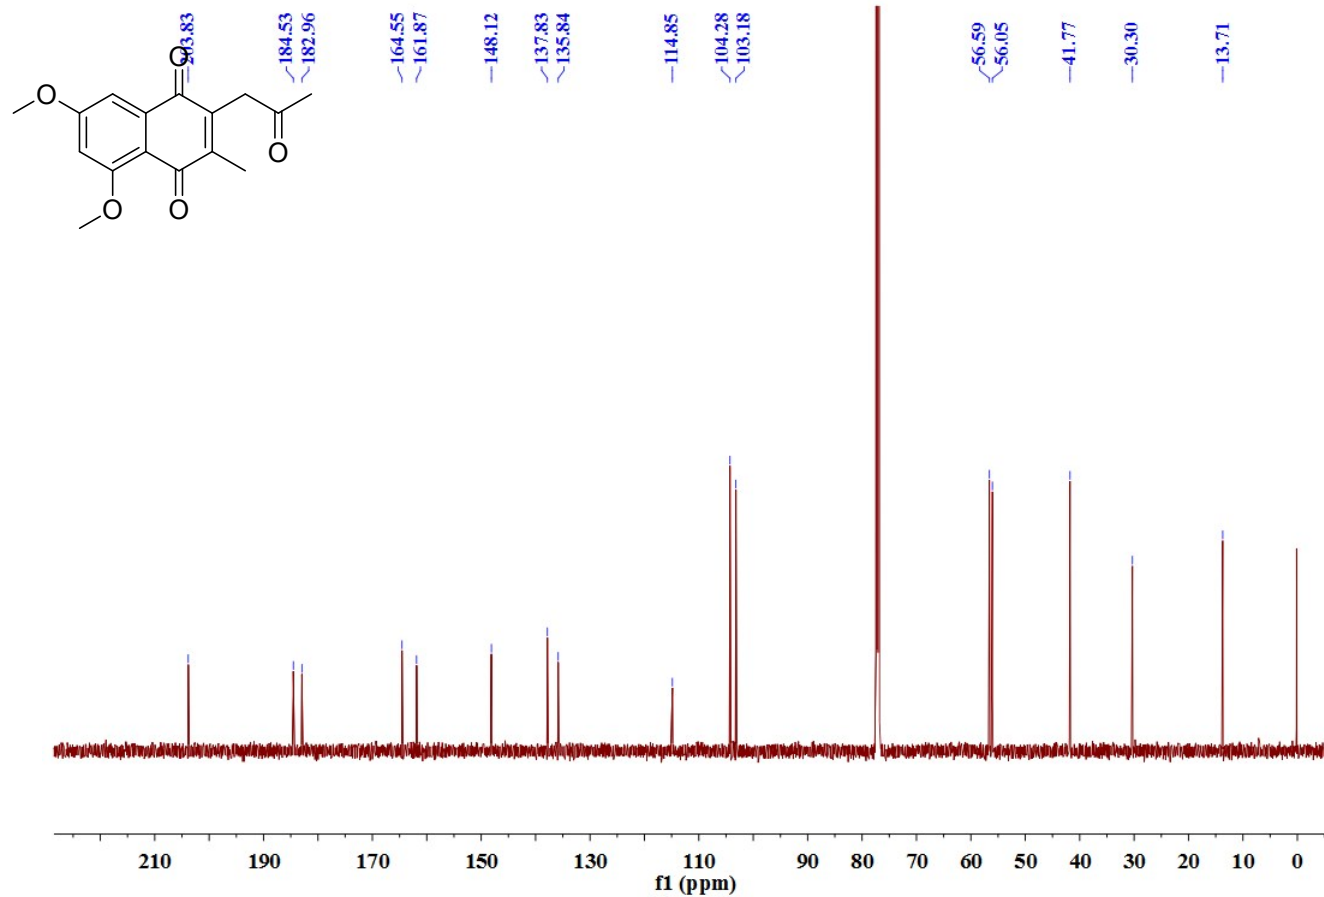

**Figure S46.**  $^1\text{H}$  NMR Spectrum of Herbarin (**6**; 600 MHz,  $\text{CDCl}_3$ )

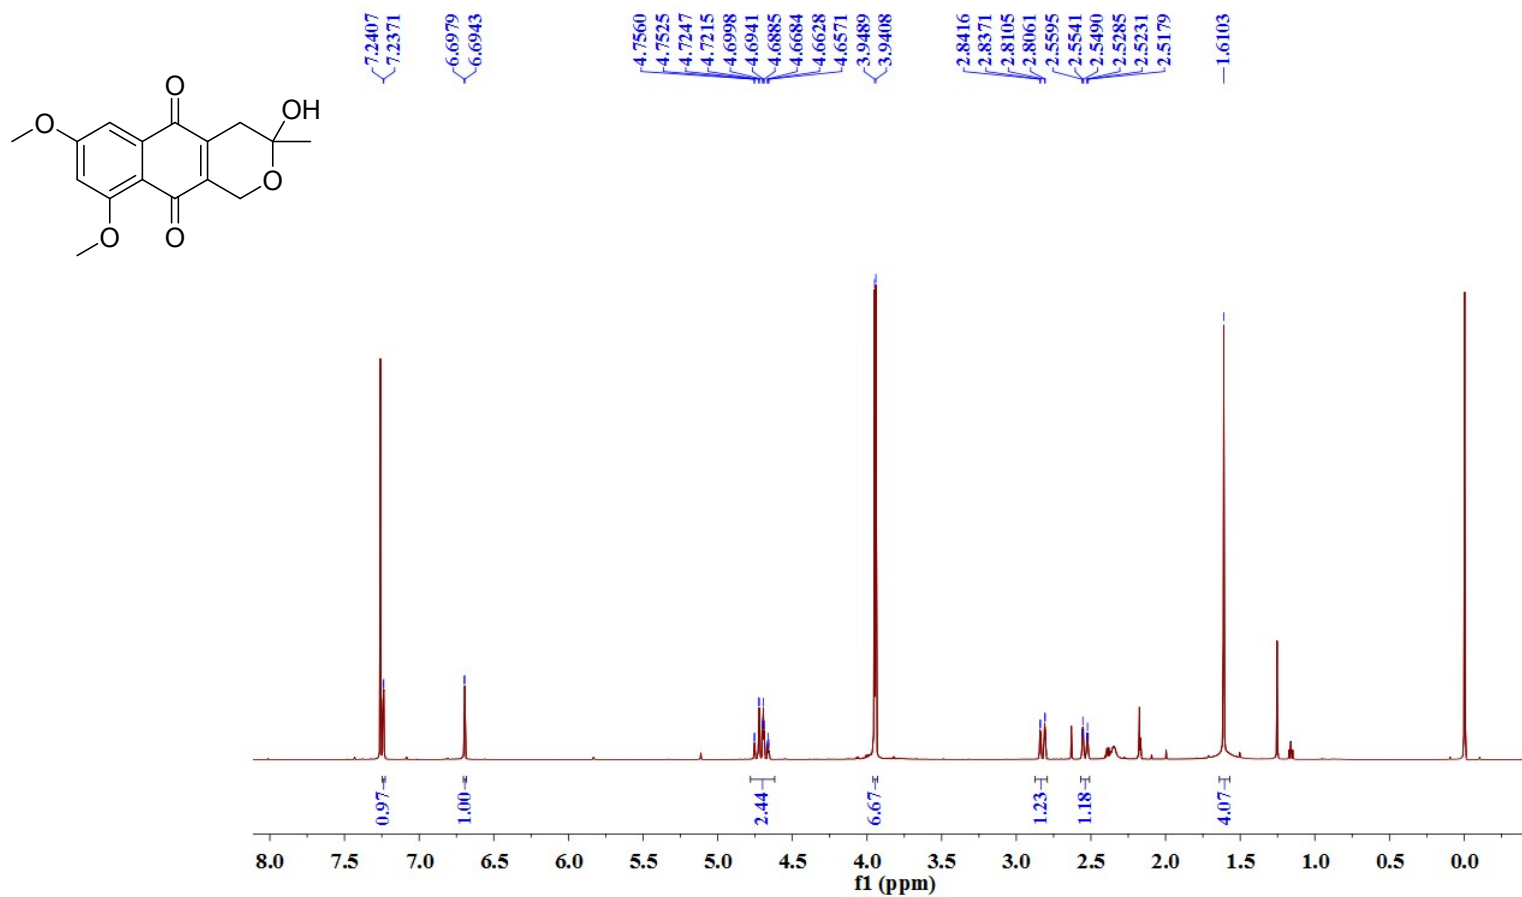

**Figure S47.**  $^{13}\text{C}$  NMR Spectrum of Herbarin (**6**; 150 MHz,  $\text{CDCl}_3$ )

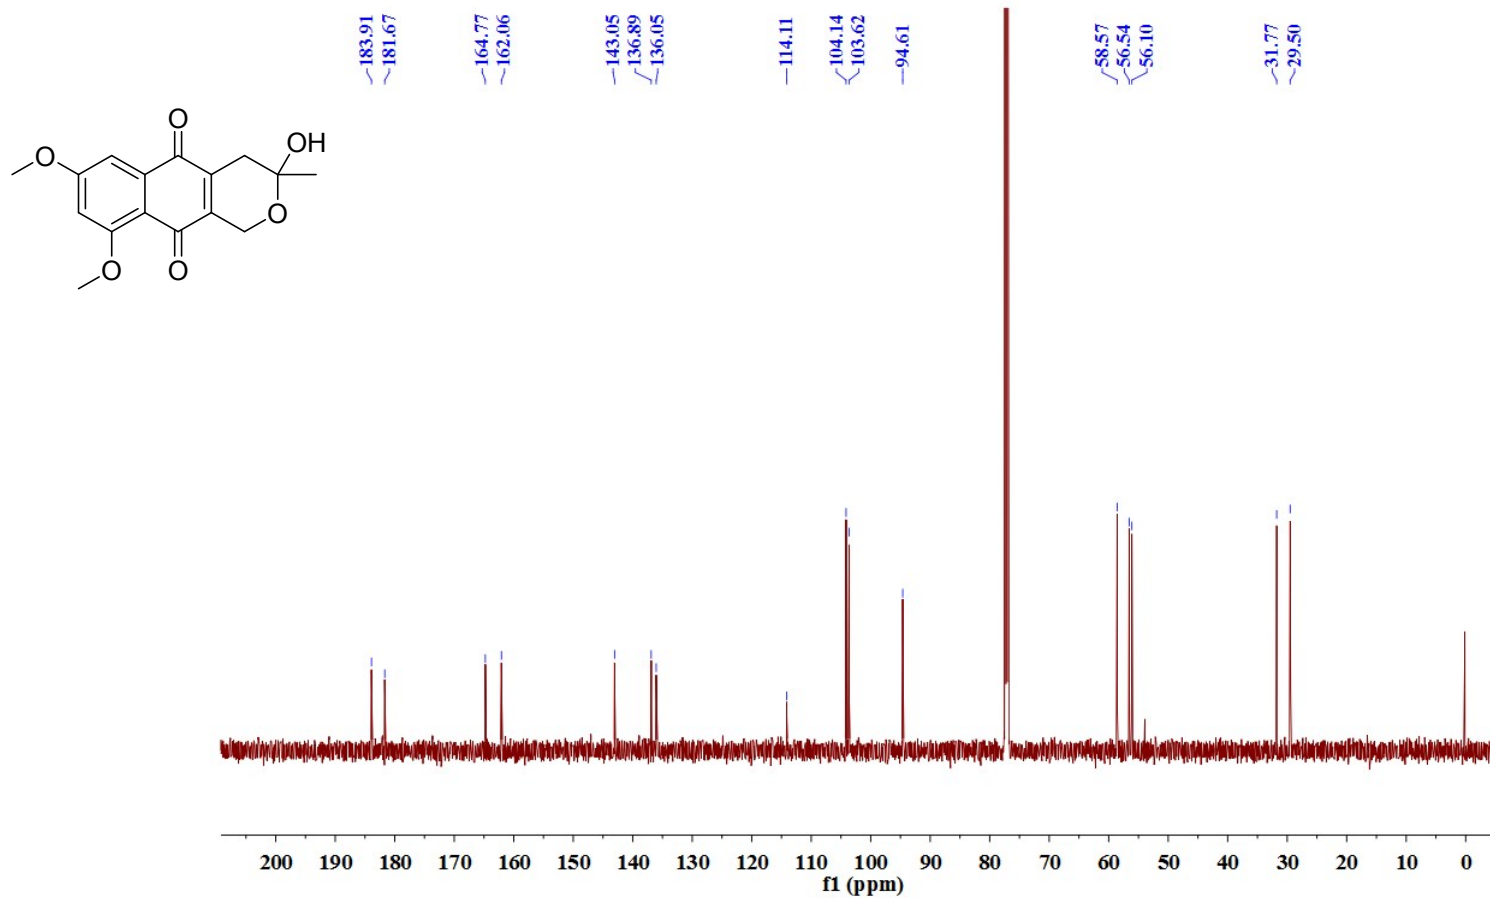

**Figure S48.**  $^1\text{H}$  NMR Spectrum of Dehydroherbarin (**7**; 400 MHz,  $\text{CDCl}_3$ )

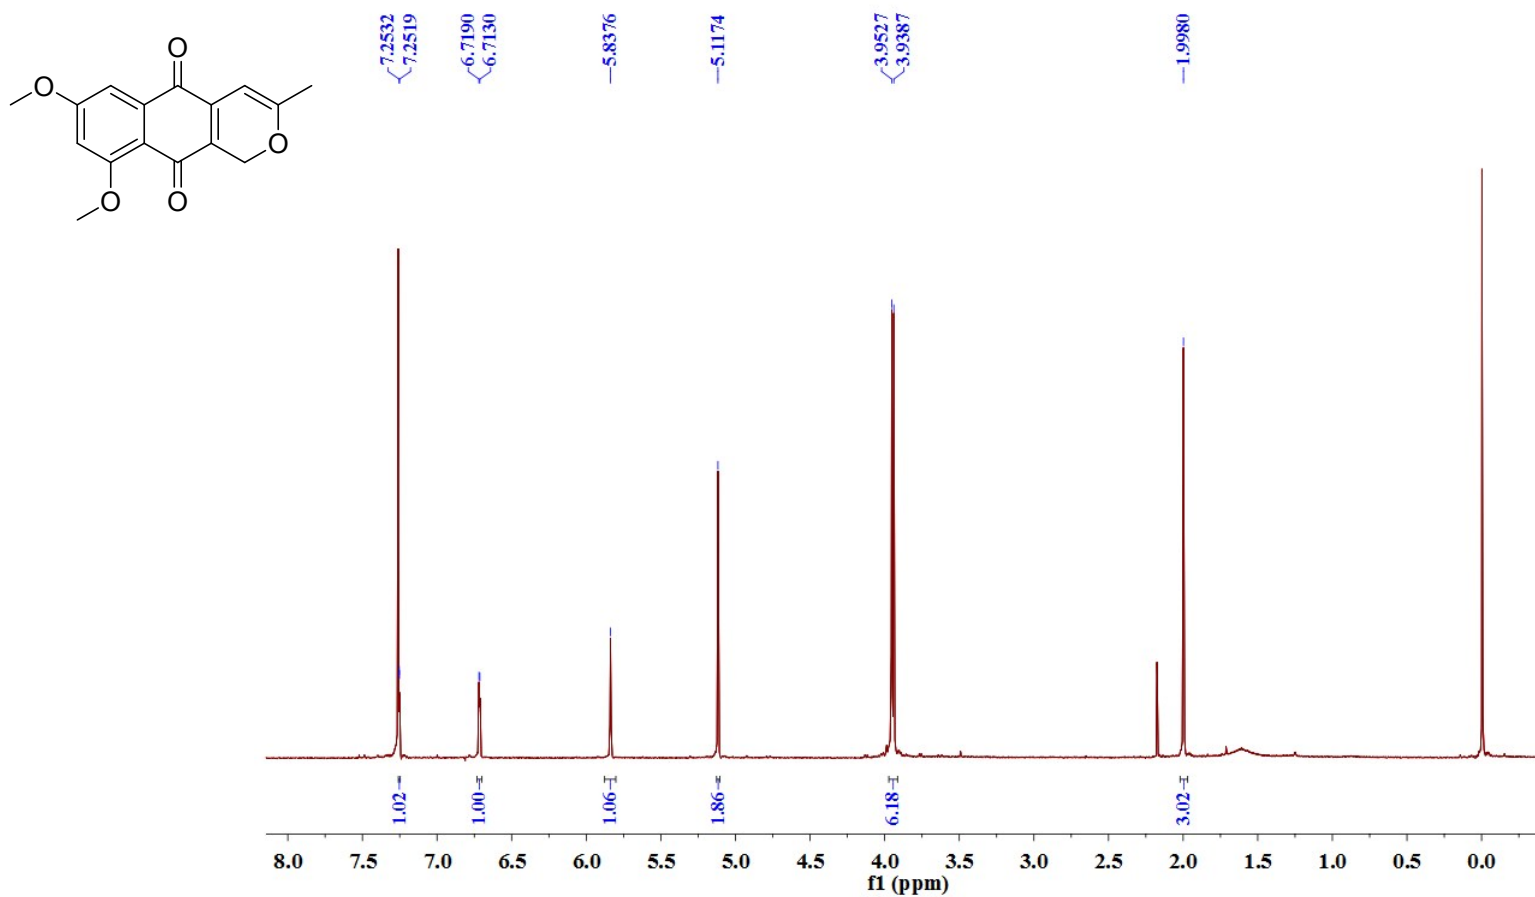

**Figure S49.**  $^{13}\text{C}$  NMR Spectrum of Dehydroherbarin (**7**; 150 MHz,  $\text{CDCl}_3$ )

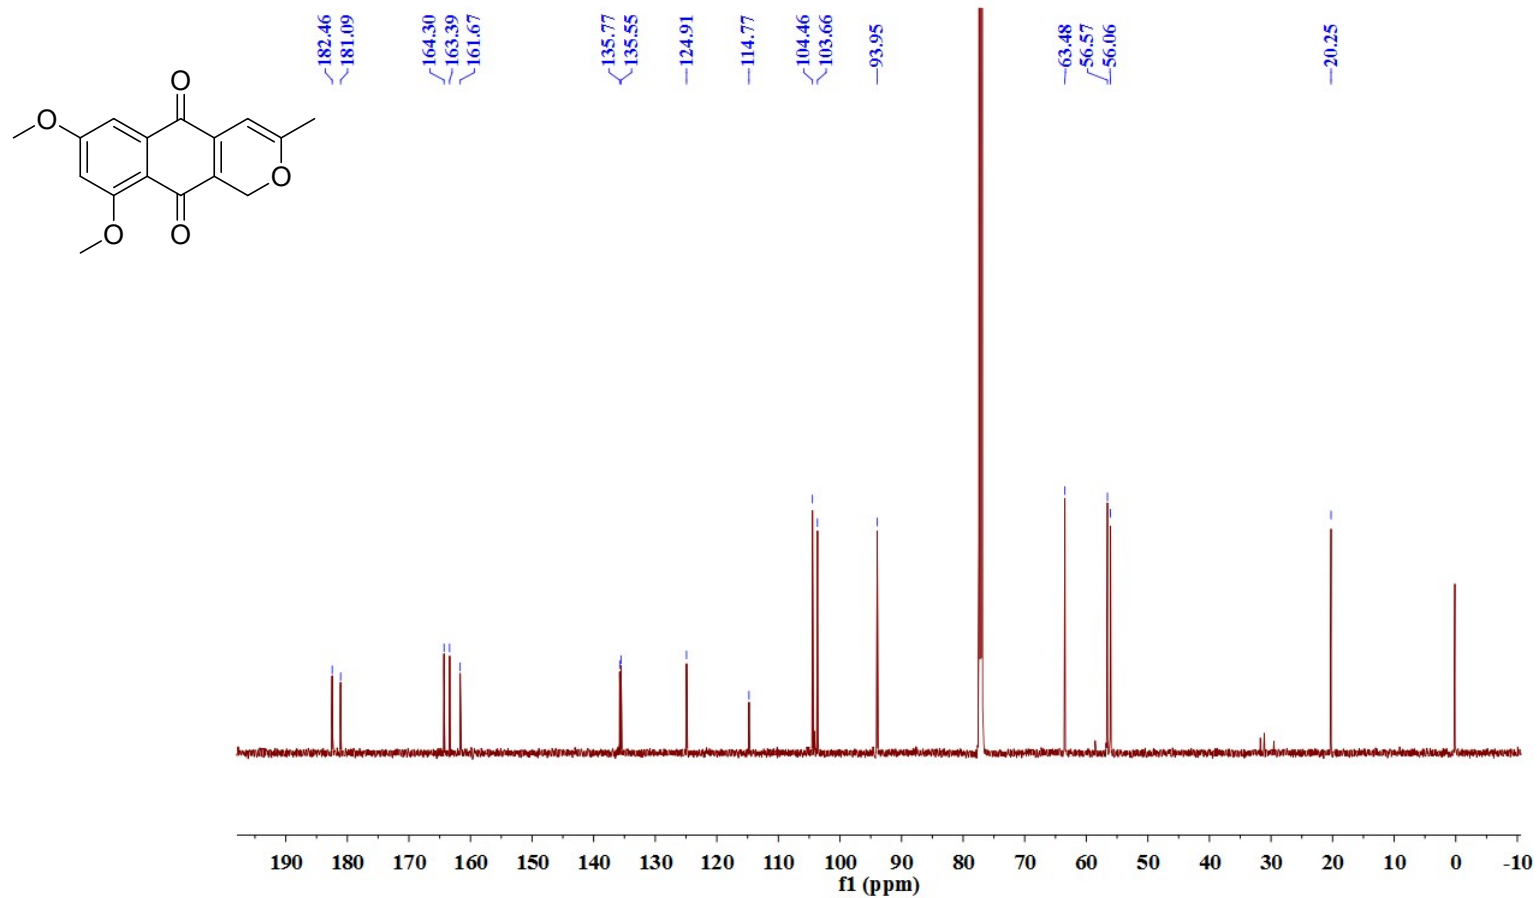

Figure S50. <sup>1</sup>H NMR Spectrum of Scorpionone (**8**; 400 MHz, CDCl<sub>3</sub>)

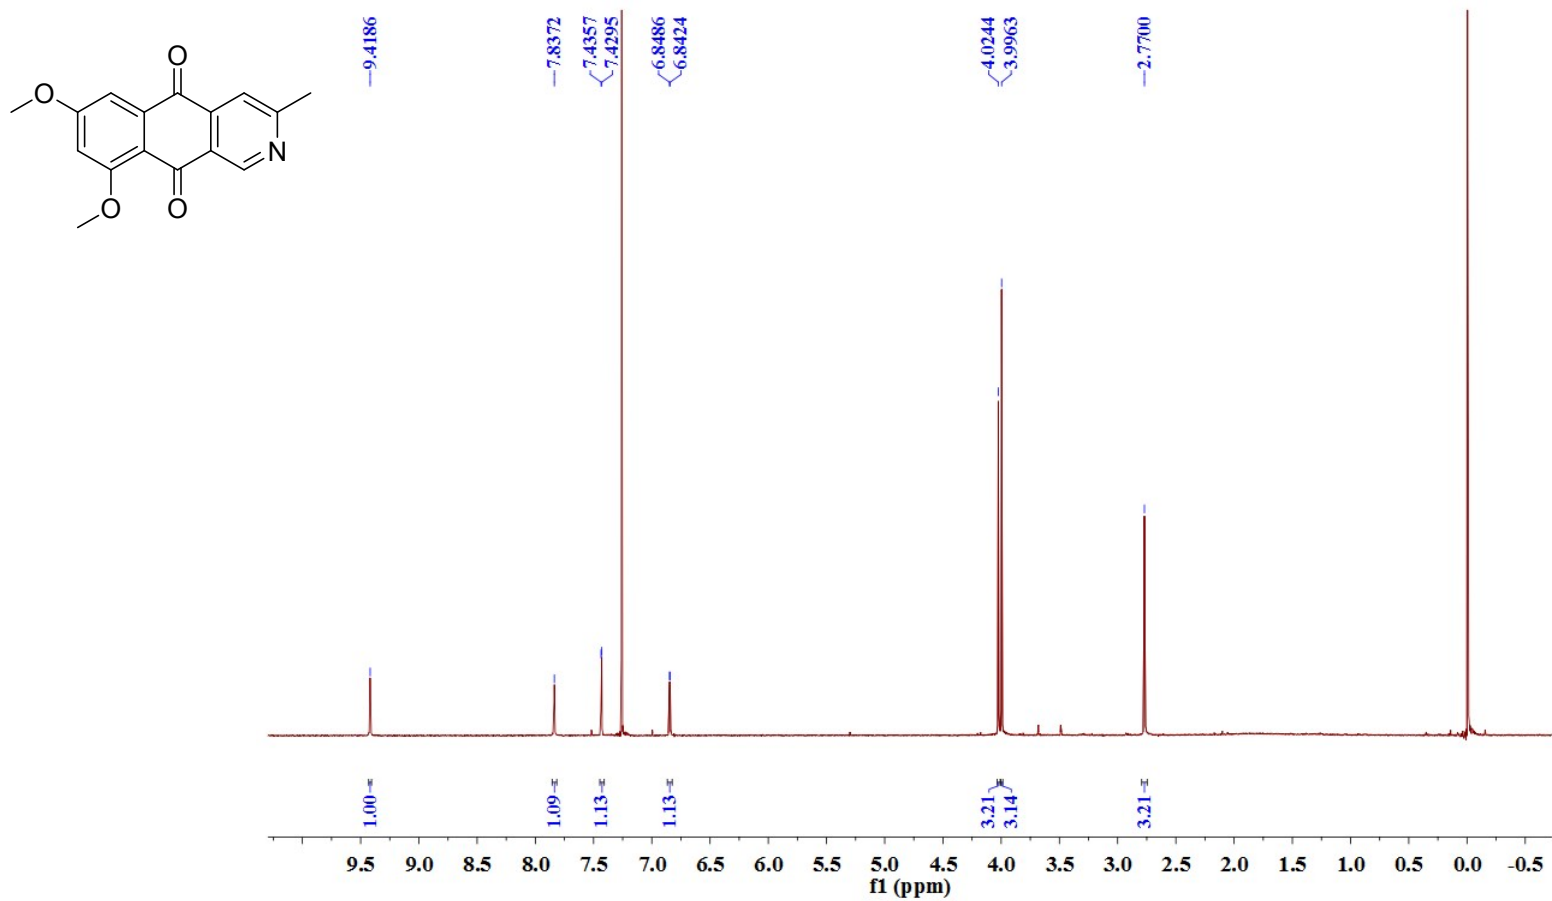

**Figure S51.**  $^{13}\text{C}$  NMR Spectrum of Scorpionone (**8**; 150 MHz,  $\text{CDCl}_3$ )

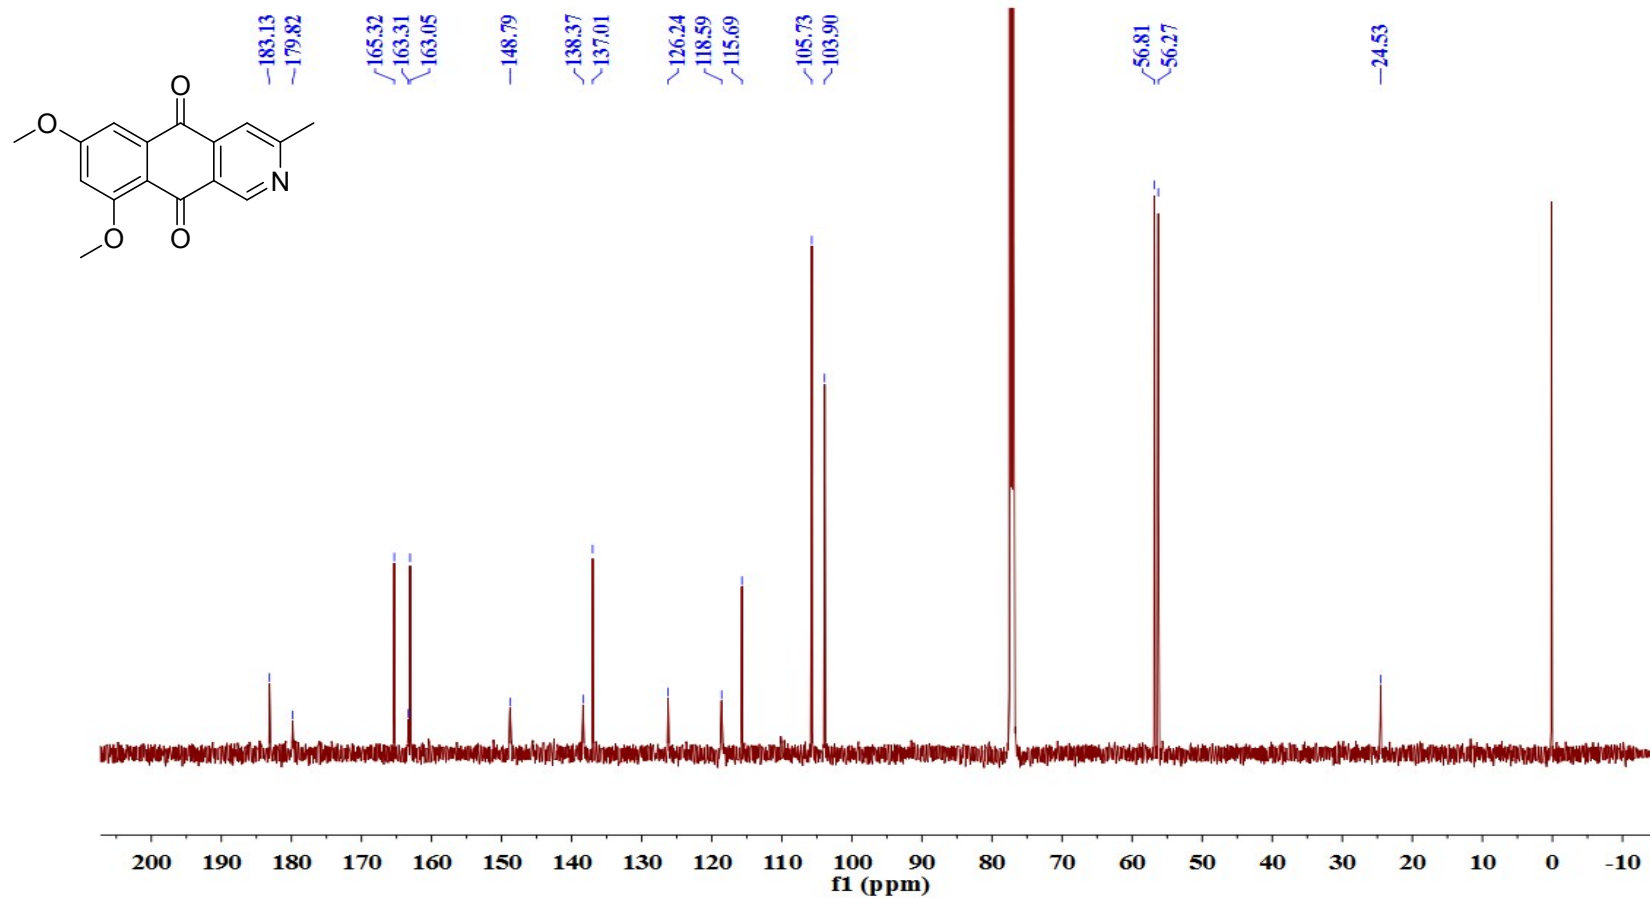

## Melting points and spectroscopic data of compounds 5–8

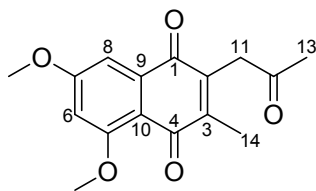

2-Acetyl-5,7-dimethoxy-3-methyl-1,4-naphthoquinone (**5**)

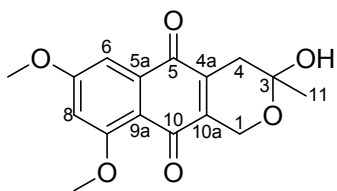

Herbarin (**6**)

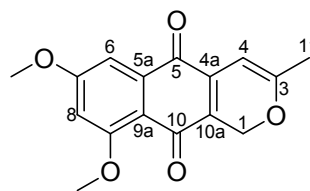

Dehydroherbarin (**7**)

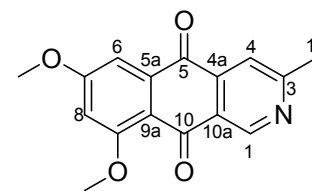

Scorpinone (**8**)

**2-Acetyl-5,7-dimethoxy-3-methyl-1,4-naphthoquinone (5).** mp 184–185 °C  $^1\text{H}$  NMR (400 MHz,  $\text{CDCl}_3$ )  $\delta_{\text{H}}$  7.22 (1H, d,  $J = 2.4$  Hz, H-8), 6.71 (1H, d,  $J = 2.4$  Hz, H-6), 3.96 (3H, s, 7-OCH<sub>3</sub>), 3.92 (3H, s, 5-OCH<sub>3</sub>), 3.74 (2H, s, H-11), 2.29 (3H, s, H-14), 2.09 (3H, s, H-13);  $^{13}\text{C}$  NMR (150 MHz,  $\text{CDCl}_3$ )  $\delta_{\text{C}}$  203.8 (C-12), 184.5 (C-1), 183.0 (C-4), 164.6 (C-7), 161.9 (C-9), 148.1 (C-2), 137.8 (C-3), 135.8 (C-9), 114.9 (C-10), 104.3 (C-8), 103.2 (C-6), 56.6 (7-OCH<sub>3</sub>), 56.1 (5-OCH<sub>3</sub>), 41.8 (C-11), 30.3 (C-13), 13.7 (C-14).

**Herbarin (6).** mp 190–191 °C  $[\alpha]_{\text{D}}^{25} +3.7$  ( $c$  0.10, MeOH);  $^1\text{H}$  NMR (600 MHz,  $\text{CDCl}_3$ )  $\delta_{\text{H}}$  7.24 (1H, d,  $J = 2.2$  Hz, H-6), 6.70 (1H, d,  $J = 2.2$  Hz, H-8), 4.74 (1H, d,  $J = 18.8$  Hz, H-1a), 4.68 (1H, dt,  $J = 18.8, 3.4$  Hz, H-1b), 3.95 (3H, s, 7-OCH<sub>3</sub>), 3.94 (3H, s, 9-OCH<sub>3</sub>), 2.81 (1H, dd,  $J = 18.6, 2.7$  Hz, H-4a), 2.52 (1H, dd,  $J = 18.6, 3.2$  Hz, H-4b), 1.61 (3H, s, H<sub>3</sub>-11);  $^{13}\text{C}$  NMR (150 MHz,  $\text{CDCl}_3$ )  $\delta_{\text{C}}$  183.9 (C-10), 181.7 (C-5), 164.2 (C-7), 162.1 (C-9), 143.1 (C-5a), 136.9 (C-4a), 136.1 (C-10a), 114.1 (C-9a), 104.1 (C-6), 103.6 (C-8), 94.6 (C-3), 58.6 (C-1), 56.4 (7-OCH<sub>3</sub>), 56.1 (9-OCH<sub>3</sub>), 31.8 (C-4), 29.5 (C-11).



**Dehydroherbarin (7).** mp 186–187 °C  $^1\text{H}$  NMR (400 MHz,  $\text{CDCl}_3$ )  $\delta_{\text{H}}$  7.25 (1H, d,  $J = 2.4$  Hz, H-6), 6.72 (1H, d,  $J = 2.4$  Hz, H-8), 5.84 (1H, s, H-4), 5.12 (2H, s, H<sub>2</sub>-1), 3.95 (3H, s, 7-OCH<sub>3</sub>), 3.94 (3H, s, 9-OCH<sub>3</sub>), 2.00 (3H, s, H<sub>3</sub>-11);  $^{13}\text{C}$  NMR (150 MHz,  $\text{CDCl}_3$ )  $\delta_{\text{C}}$  182.5 (C-10), 181.1 (C-5), 164.3 (C-7), 163.4 (C-9), 161.7 (C-3), 135.8 (C-4a), 135.6 (C-5a), 124.9 (C-10a), 114.8 (C-9a), 104.5 (C-6), 103.7 (C-8), 94.0 (C-4), 63.5 (C-1), 56.6 (7-OCH<sub>3</sub>), 56.1 (9-OCH<sub>3</sub>), 20.2 (C-11).

**Scorpinone (8).** mp 195–196 °C  $^1\text{H}$  NMR (400 MHz,  $\text{CDCl}_3$ )  $\delta_{\text{H}}$  9.42 (1H, s, H-1), 7.84 (1H, s, H-4), 7.43 (1H, d,  $J = 2.4$  Hz, H-6), 6.84 (1H, d,  $J = 2.4$  Hz, H-8), 4.02 (3H, s, 9-OCH<sub>3</sub>), 4.00 (3H, s, 7-OCH<sub>3</sub>), 2.77 (3H, s, H-11);  $^{13}\text{C}$  NMR (150 MHz,  $\text{CDCl}_3$ )  $\delta_{\text{C}}$  183.1 (C-5), 179.8 (C-10), 165.3 (C-7), 163.3 (C-3), 163.1 (C-9), 148.8 (C-1), 138.4 (C-10a), 137.0 (C-5a), 126.2 (C-4a), 118.6 (C-4), 115.7 (C-9a), 105.7 (C-8), 103.9 (C-6), 56.8 (9-OCH<sub>3</sub>), 56.3 (7-OCH<sub>3</sub>), 24.5 (C-11).

### Scheme S1. Hypothetical Biosynthetic Pathways for 1–8

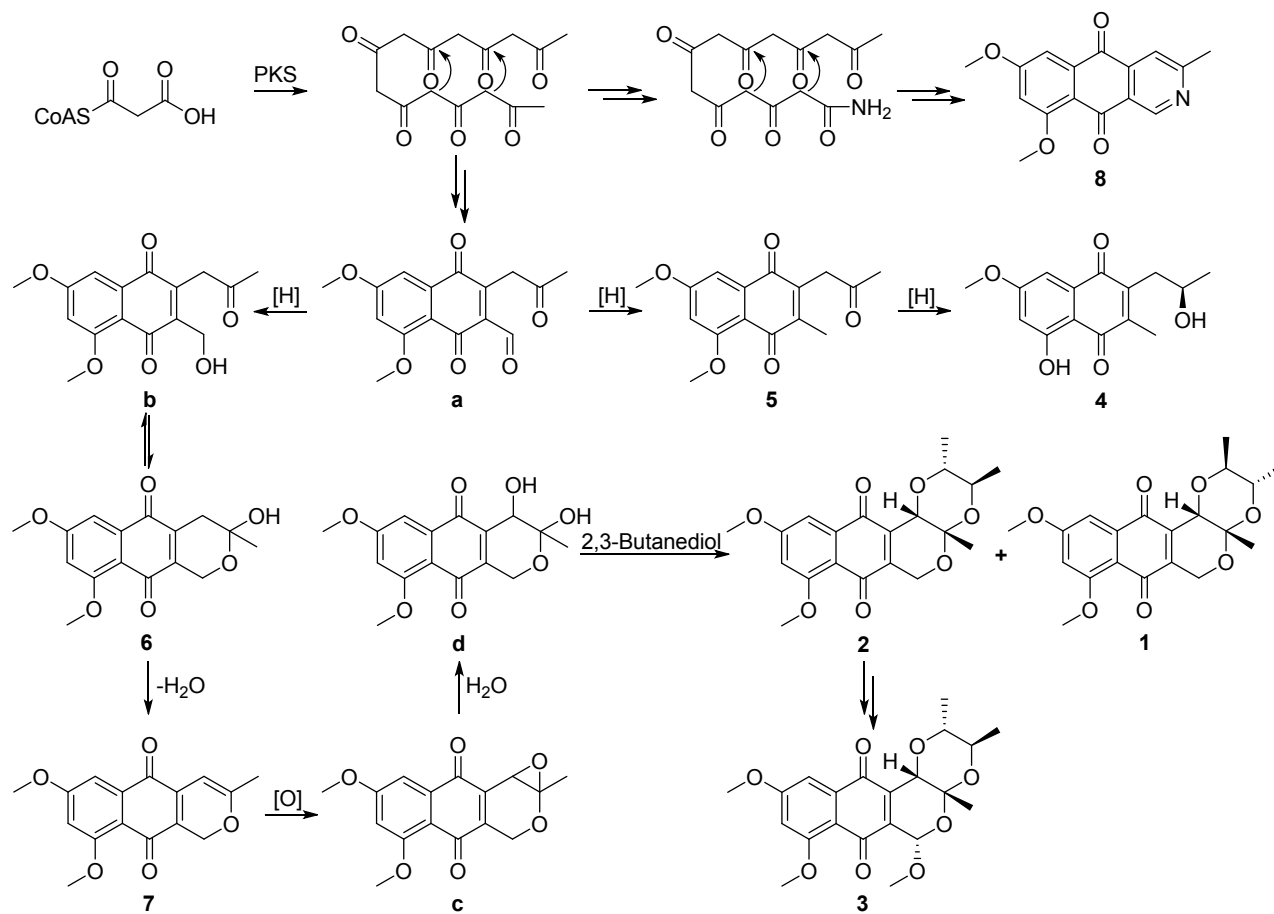

Supplement: c9ra01787a1.pdf [file c9ra01787a1.pdf]
